# Supplementary material for: Caregivers with limited language proficiency and their satisfaction with paediatric emergency care related to the use of professional interpreters: a mixed methods study
Source: PubMed Central journal article supplement — BMJ Open. 2024 Jan 12;14(1):e077716. doi: 10.1136/bmjopen-2023-077716 (PMC10806666; doi:10.1136/bmjopen-2023-077716), 2024-01-12

# BMJ Open

BMJ Open is committed to open peer review. As part of this commitment we make the peer review history of every article we publish publicly available.

When an article is published we post the peer reviewers' comments and the authors' responses online. We also post the versions of the paper that were used during peer review. These are the versions that the peer review comments apply to.

The versions of the paper that follow are the versions that were submitted during the peer review process. They are not the versions of record or the final published versions. They should not be cited or distributed as the published version of this manuscript.

BMJ Open is an open access journal and the full, final, typeset and author-corrected version of record of the manuscript is available on our site with no access controls, subscription charges or pay-per-view fees (<http://bmjopen.bmj.com>).

If you have any questions on BMJ Open's open peer review process please email [info.bmjopen@bmj.com](mailto:info.bmjopen@bmj.com)

# BMJ Open

## The satisfaction of caregivers with limited language proficiency with the quality of pediatric emergency care related to the use of professional interpreter services – a mixed methods study

|                               |                                                                                                                                                                                                                                                                                                                                                                                                                                                                                                                                                                                                                                                                                                                                                                                  |
|-------------------------------|----------------------------------------------------------------------------------------------------------------------------------------------------------------------------------------------------------------------------------------------------------------------------------------------------------------------------------------------------------------------------------------------------------------------------------------------------------------------------------------------------------------------------------------------------------------------------------------------------------------------------------------------------------------------------------------------------------------------------------------------------------------------------------|
| Journal:                      | <i>BMJ Open</i>                                                                                                                                                                                                                                                                                                                                                                                                                                                                                                                                                                                                                                                                                                                                                                  |
| Manuscript ID                 | bmjopen-2023-077716                                                                                                                                                                                                                                                                                                                                                                                                                                                                                                                                                                                                                                                                                                                                                              |
| Article Type:                 | Original research                                                                                                                                                                                                                                                                                                                                                                                                                                                                                                                                                                                                                                                                                                                                                                |
| Date Submitted by the Author: | 12-Jul-2023                                                                                                                                                                                                                                                                                                                                                                                                                                                                                                                                                                                                                                                                                                                                                                      |
| Complete List of Authors:     | Gmünder, Myriam; Inselspital Universitätsspital Bern Kinderklinik, emergency department<br>Gessler, Noemi; Inselspital Universitätsspital Bern Kinderklinik, emergency department<br>Buser, Sina; Inselspital Universitätsspital Bern Kinderklinik, emergency department<br>Feuz, Ursula; Inselspital Universitätsspital Bern Kinderklinik, emergency department<br>Fayyaz, Jabeen; The Hospital for Sick Children, emergency department<br>Jachmann, Anne; Inselspital Universitätsspital Bern Kinderklinik, Emergency Medicine<br>Keitel, Kristina; Inselspital Universitätsspital Bern, Paediatric Emergency Department<br>Brandenberger, Julia; The Hospital for Sick Children, emergency department; Inselspital Universitätsspital Bern Kinderklinik, emergency department |
| Keywords:                     | ACCIDENT & EMERGENCY MEDICINE, Health Equity, PAEDIATRICS                                                                                                                                                                                                                                                                                                                                                                                                                                                                                                                                                                                                                                                                                                                        |
|                               |                                                                                                                                                                                                                                                                                                                                                                                                                                                                                                                                                                                                                                                                                                                                                                                  |

SCHOLARONE™  
Manuscripts

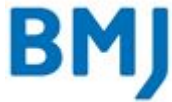

I, the Submitting Author has the right to grant and does grant on behalf of all authors of the Work (as defined in the below author licence), an exclusive licence and/or a non-exclusive licence for contributions from authors who are: i) UK Crown employees; ii) where BMJ has agreed a CC-BY licence shall apply, and/or iii) in accordance with the terms applicable for US Federal Government officers or employees acting as part of their official duties; on a worldwide, perpetual, irrevocable, royalty-free basis to BMJ Publishing Group Ltd ("BMJ") its licensees and where the relevant Journal is co-owned by BMJ to the co-owners of the Journal, to publish the Work in this journal and any other BMJ products and to exploit all rights, as set out in our [licence](#).

The Submitting Author accepts and understands that any supply made under these terms is made by BMJ to the Submitting Author unless you are acting as an employee on behalf of your employer or a postgraduate student of an affiliated institution which is paying any applicable article publishing charge ("APC") for Open Access articles. Where the Submitting Author wishes to make the Work available on an Open Access basis (and intends to pay the relevant APC), the terms of reuse of such Open Access shall be governed by a Creative Commons licence – details of these licences and which [Creative Commons](#) licence will apply to this Work are set out in our licence referred to above.

Other than as permitted in any relevant BMJ Author's Self Archiving Policies, I confirm this Work has not been accepted for publication elsewhere, is not being considered for publication elsewhere and does not duplicate material already published. I confirm all authors consent to publication of this Work and authorise the granting of this licence.

1  
2  
3 **The satisfaction of caregivers with limited language proficiency with the**  
4 **quality of pediatric emergency care related to the use of professional**  
5 **interpreter services – a mixed methods study**  
6  
7  
8  
9

10 Myriam Gmünder MD<sup>1\*</sup>, Noemi Gessler MD<sup>1\*</sup>, Sina Buser MD<sup>1</sup>, Ursula Feuz<sup>1</sup>, Jabeen Fayyaz<sup>2</sup>,  
11  
12 Anne Jachmann MD<sup>3</sup>, Kristina Keitel MD PhD<sup>1+</sup> and Julia Brandenberger MD PhD<sup>1, 2, 4+</sup>  
13  
14  
15  
16  
17

18 <sup>1</sup> Pediatric Emergency department, University Hospital of Bern, Bern, Switzerland  
19

20 <sup>2</sup> Division of Pediatric Emergency Medicine, Hospital for Sick Children, Toronto, Ontario,  
21  
22 Canada  
23

24 <sup>3</sup> Emergency Department, University Hospital of Bern, Bern, Switzerland  
25  
26

27 <sup>4</sup> Edwin S.H. Leong Centre for Healthy Children, University of Toronto, Toronto, ON, Canada  
28  
29  
30

31  
32 \* shared first authors; + shared last authors  
33  
34  
35

36 Corresponding author  
37

38 Julia Brandenberger, MD PhD  
39

40 Notfallzentrum für Kinder und Jugendliche (NZKJ)  
41

42 University Hospital of Bern, Bern, Switzerland  
43

44 Freiburgstrasse 15, 3010 Bern, Switzerland  
45

46 Phone: +41 31 632 92 77  
47

48 E-mail: [julia.brandenberger@extern.insel.ch](mailto:julia.brandenberger@extern.insel.ch)  
49  
50  
51  
52  
53  
54

55 **Supported by:** the “Stiftung KinderInsel Bern” (formerly known as Batzebär foundation) and  
56 the Edwin S.H. Leong Centre for Healthy Children, Toronto, Canada to JB.  
57

58 **COI:** The authors declare that they have no conflict of interest.  
59  
60

**Keywords:** migrant health; children; immigrant; refugee, interpreter, emergency department, Europe, equity, communication, limited language proficiency, self-advocacy

## ***Abstract***

### **Objectives**

Communication is a main challenge in migrant health and essential for patient safety. The aim of this study was to describe the satisfaction of caregivers with limited language proficiency (LLP) with care related to the use of interpreters and to explore underlying and interacting factors influencing satisfaction and self-advocacy.

### **Design**

A mixed-methods study

### **Setting**

Pediatric emergency department (PED), a tertiary care hospital in Bern, Switzerland

### **Participants and methods**

Caregivers presenting at the PED were systematically screened for their language proficiency. Semi-structured interviews were conducted with all LLP-caregivers agreeing to participate and their administrative data was extracted.

### **Results**

The study included 181 caregivers, 14 of whom received professional language interpretation. Caregivers who were assisted by professional interpretation services were more satisfied than those without (5.5[SD] ±1.4 versus 4.8[SD] ±1.6). Satisfaction was influenced by 5 main factors (relationship with health workers, patient management, alignment of health concepts, personal expectations, health outcome of the patient) which were modulated by communication. Of all LLP-caregivers without professional interpretation, 44.9% were satisfied with communication due to low expectations regarding the quality of communication, unawareness of the availability of professional interpretation, and overestimation of own language skills, resulting in low self-advocacy.

### **Conclusion**

The use of professional interpreters had a positive impact on the overall satisfaction of LLP-caregivers with emergency care. LLP-caregivers were not well—positioned to advocate for language interpretation. Health care providers must be aware of their responsibility to guarantee good quality communication to ensure equitable quality of care and patient safety.

### ***Strengths and limitations of this study***

- The mixed methods approach allowed to measure the satisfaction with care of caregivers with LLP and also to explore underlying reasons.
- Through the qualitative data, additional important findings were discovered like reasons for limited caregiver self-advocacy for professional language interpretation.
- By systematically assessing and comparing comprehension of diagnosis and treatment to the self-reported comprehension of caregivers, important discrepancies were detected.
- Participation of professional interpreters and study participants in designing and analysing the data increased the validity of the study and accuracy of the findings.
- The study group where an interpreter was used was small, not allowing for interferential statistical testing.

1  
2  
3  
4  
5  
6  
7  
8  
9  
10  
11  
12  
13  
14  
15  
16  
17  
18  
19  
20  
21  
22  
23  
24  
25  
26  
27  
28  
29  
30  
31  
32  
33  
34  
35  
36  
37  
38  
39  
40  
41  
42  
43  
44  
45  
46  
47  
48  
49  
50  
51  
52  
53  
54  
55  
56  
57  
58  
59  
60

***Abbreviation***

LLP = Limited language proficiency

PED = Pediatric emergency department

For peer review only

## ***Introduction***

Language barriers and insufficient communication are major challenges in migrant health care delivery leading to decreased access and quality of care (1-7). In Switzerland, an estimated 10% of the population face language barriers on a daily base as they either do not speak one of the four national languages or have another preferred language (8, 9). This proportion was further increased by the recent influx of Ukrainian refugees (10). Successful communication, preferably with professional interpreters, is widely described as essential to minimize disparities in the quality of health care for these patients (1, 4, 8, 11-13). Yet, international evidence clearly shows that professional interpreters are underused in health care settings (1, 14-23).

A literature review including studies from the United States, Australia, the United Kingdom, Ireland, and Canada investigated the impact of language proficiency on the patient's experience in health care and found that impaired communication, relationship, discrimination, and cultural safety were main concerns. Factors improving the health care experience of patients with limited language proficiency (LLP) were mitigating language barriers through interpreters, offering translated patient resources and improve transcultural competencies of health care professionals (24). Other studies recommended systematic communication pathways for LLP patients (10) including improved guidelines on the use of interpreters, minimized barriers to access interpreter services, including sufficient financial coverage, and raised awareness about the importance of the use of interpreters among health workers (1, 14-16, 25-27). Improvements of the health care delivery to LLP patients were most successful if a participatory approach was chosen (28). Despite the considerable proportion of the population in Switzerland with LLP, evidence focusing on their perspective on the quality of health care related to communication is missing.

The goal of this study was to describe the satisfaction of LLP-caregivers related to the use of interpreters as a driver of quality of pediatric emergency care and to explore underlying, interacting factors influencing satisfaction.



## **Methods**

### **Study setting**

The study was conducted at the pediatric emergency department of the University Hospital of Bern, Switzerland. The department provides the full range of emergency care for children and adolescents aged 0-16 years to an average of over 30,000 patients per year. Since 2021 it is part of the “Swiss health network for equity”.

### **Study design**

This study is a concurrent design mixed-method study (supplemental figure 1). As this study aimed to explore caregivers’ satisfaction related to the use of interpreters as part of health care management and delivery, it explored satisfaction in the context of a broad, complex, and multidimensional field. In such cases, a mixed-methods research design is known to offer multiple advantages (29), including the examination of the research question from multiple perspectives (30), the triangulation of two different methods and several forms of data (31-34) and the pragmatic flexibility of the methodology to adapt to the specific research question and context (35, 36). Following recommendations of Creswell and Zhang (37), quantitative and qualitative data were collected simultaneously. The quantitative data included electronic health records and quantitative measurements of the caregivers’ satisfaction. The qualitative data consisted of semi-structured interviews. Both datasets were analyzed in parallel and relationships between the condensed qualitative and quantitative results were visualized to obtain an in-depth understanding of caregivers’ satisfaction and its underlying factors. The most recent Equator network recommended standardized mixed-method research guidelines were used for the reporting of the study (supplemental table 1) (38).

The primary outcome was to compare the LLP-caregivers’ satisfaction with health care with and without the use of professional interpreters. Secondary outcomes were the analysis of self-reported versus assessed language proficiency, the comprehension of diagnosis and received therapy of their child, and their communication strategy and desire for professional interpreters.

This study was nested into an interventional study intended to increase the use of professional interpreter service (23). Consequently, data collection for this study was done during the predefined two time periods.

## Study population

All patients presenting to the emergency department between 1<sup>st</sup> April 2021 and 30<sup>th</sup> June 2021 (first recruitment period) and between 1<sup>st</sup> October and 5<sup>th</sup> December 2021 (second recruitment period), were screened for the following inclusion criteria using the administrative records: i) Nationality other than Swiss AND ii) Swiss nationality with national language other than German (G), French (F) or English (E) AND iii) not presenting only for a COVID-19 swab test.

All caregivers of patients who visited the emergency department and fulfilled the inclusion criteria were systematically called and screened for their language proficiency within one week after their consultation. If two caregivers were present at the consultation, the one with better language skills was screened. The ABC-Tool (39), a globally used standardized language proficiency screening tool, was adapted by the study team to the local context. The language proficiency was classified, using the scoring system defined by the 'Goethe Institute', the most established international language school for German (40). It ranges from A1 (very LLP) to C1 (fluent). All caregivers screened as A1 or A2 were classified as caregivers with LLP. If informed consent was given, the LLP caregiver was contacted a few days later for a semi-structured phone interview with a professional interpreter. The caregivers who completed the study interview represented the final study population.

## Data collection

Quantitative and qualitative data collection, including phone call screenings and interviews, was conducted by Myriam Gmünder (MG) and Sina Buser (SB). During the study period they were employed as doctoral candidates at the pediatric emergency department of the University's Hospital in Bern in the migrant health service research group. Both researchers had previous experience in pediatric migrant health research and were trained by JB and NG in the conduction of diversity-sensitive, semi-structured interviews using presentations, role-play, and educational videos. JB has extensive experience in qualitative research and pediatric migrant health.

## Qualitative data

A semi-structured interview guide was designed by an interprofessional team using different versions for consultations with and without the use of professional interpreters (supplemental table 2). The questionnaires entailed closed (quantitative data) and open (qualitative data) questions. Core qualitative questions explored reasons for the perceived quality of care with a focus on communication and the caregiver's confidence while communicating. All of these

1  
2  
3 questions were mandatory. Questions were followed by non-mandatory prompts, allowing the  
4 interviewer to further explore interesting comments made by the caregiver.

5  
6 The interview guide was reviewed by a professional and experienced interpreter with migrant  
7 background. After external revision, pilot interviews were performed to verify  
8 comprehensibility, acceptability and duration. A further revision was done based on  
9 experiences from pilot interviews..

10 All interviews were conducted with a professional phone interpreter who translated the  
11 caregiver's preferred language to German using iPhone SE/6's conference mode (Version iOS  
12 15.1/12.5.5).

13  
14 Quotes from interviews of caregivers during health encounters using a professional interpreter  
15 were cited with A. Those without interpreter services were cited with B, followed by the  
16 interview number.

### 17 18 19 20 21 22 23 24 25 **Quantitative data**

26 For each participant, quantitative variables were extracted from routine administrative health  
27 records: nationality, age, gender, date of visit, diagnosis, therapy, and triage score. An  
28 Emergency Triage Scale (STS), ranging from 1: acute life-threatening to 5: non urgent problems,  
29 was used (41). Further variables were collected during the phone interview: satisfaction,  
30 accompanying person/s, native language, self-reported and estimated language skills in G/E/F,  
31 interpreter use, the child's diagnosis, \therapy received, recency of immigration to  
32 Switzerland, caregiver's education, and resident status.

33  
34 Caregiver were asked about their satisfaction with the health encounter ranging from 1 (very  
35 unsatisfied) to 6 (very satisfied). To describe the self-reported language comprehension,  
36 caregivers were asked if the information they received during the emergency department visit  
37 was understandable. The answers were classified as yes, partially, or no. To assess  
38 comprehension, the study team asked caregivers to explain the diagnosis and the treatments  
39 the child received during the health visit. If the caregivers' answers corresponded to the  
40 diagnosis and treatments recorded in the electronic medical report, they were marked as  
41 match. Partial matches or discrepant answers were documented as partially correct or  
42 incorrect.

### 43 44 45 46 47 48 49 50 51 52 53 54 55 **Data management and analysis**

56 All data were entered into a REDCap-database (Vanderbilt University/IC 6.9.4, 2018).  
57 For quantitative data, entry fields were designed as binary radio button fields or scroll down  
58 lists. Branching logic was used where appropriate.  
59  
60

1  
2  
3 REDCap data quality control tests were performed before analysis. STATA (Stata/IC Version  
4 13.1. 2013) was used for statistical analysis.

5  
6 Qualitative data was transcribed simultaneously to the phone interview and directly entered in  
7 the REDCap database. Three free-text fields summarized statements about the general patient  
8 satisfaction, two text fields documented caregivers' descriptions of his/her comprehension  
9 during the health visit, and one additional text field was used for further interesting statements.  
10 For each of the 3 groups of free-text fields, answers from all participants were pooled together  
11 in one document and coded deductively and inductively by two coders (NG and MG) using the  
12 text analysis approach according to Mayring (42). Citations from LLP-caregivers in the  
13 interpreter group were compared to those from the non-interpreter group. Saturation of the  
14 material was reached in both groups.

15  
16 During multiple online and in-person meetings, data was analyzed in a stepwise approach in  
17 an interprofessional team. The team included the authors of this study, a professional  
18 interpreter with migrant background, and one migrant caregiver. Stepwise aggregation of the  
19 qualitative data resulted in the following categories: Satisfaction, communication, expectation,  
20 health concept, relationship, and patient management. The relationships between the  
21 condensed qualitative and quantitative results were visualized in multiple networks,  
22 illustrating the final outcomes of this study.

## 23 24 25 **Ethics**

26  
27 The Study protocol was reviewed (abbreviated process) and approved by the Ethics  
28 Committee of the canton Bern on 08 March 2021.

## 29 30 31 **Results**

### 32 33 34 **Study population**

35  
36 A total of 181 caregivers were included in this study. 14 had a consultation with, and 167 a  
37 consultation without, an interpreter (supplemental figure 2).

38  
39 In consultations using an interpreter the most frequent nationalities were Eritrean 6/14  
40 (42.9%), Syrian 3/14 (21.4%) and Sri Lankan 2/14 (14.3%). A total of 57.1% (8/14) received  
41 an urgent triage score. Most caregivers graduated from primary school 6/14 (42.9%) followed  
42 by secondary school 5/14 (35.7%), while 2/14 (14.3%) were illiterate.

1  
2  
3 The most common nationalities in consultations without an interpreter were Syrian 37/167  
4 (22.2%), Eritrean 26/167 (15.6%), and Portuguese 13/167 (7.8%). A total of 25.1% (42/167)  
5 received an urgent triage score. The most frequent educational degree of these caregivers was  
6 secondary school 64/167 (38.3%), followed by primary school 56/167 (33.5%). 12.6%  
7 (21/167) were illiterate (table 1).  
8  
9

### 10 11 12 **Overall satisfaction**

13  
14 The satisfaction was high in both groups with a total mean of 4.9 (Standard Deviation [SD]  
15  $\pm 1.6$ ). Caregivers in consultations with an interpreter were more satisfied than those in the  
16 non-interpreter group (5.5 [SD]  $\pm 1.4$  versus 4.8 [SD]  $\pm 1.6$ ; table 2). Satisfaction was  
17 influenced by 5 main factors: relationship with the health workers, patient management,  
18 alignment of health concepts, caregivers' personal expectation, and health outcome of the  
19 patient (figure 1). Satisfaction was optimal when the patient management met the caregiver's  
20 expectation, the relationship between health workers and caregivers was respectful and  
21 trustful, and when there was agreement on the same health concept (figure 2). Communication  
22 was the main tool able to modulate relationships, expectations, and health concepts  
23 influencing satisfaction through these factors.  
24  
25  
26  
27  
28  
29  
30  
31

### 32 **Satisfaction related to the use of interpreters**

33  
34 In both groups, caregivers mentioned good communication as a key precondition for their  
35 satisfaction with the health encounter. In the group with an interpreter, all caregivers described  
36 the organization of interpreters as a sensible and helpful part of the patient management. The  
37 opinion on how often and when an interpreter was needed varied. Two caregivers thought an  
38 interpreter was only necessary for complex conversations.  
39  
40  
41  
42

43 "At the beginning I could communicate well, but when it became more complicated,  
44 the hospital organized an interpreter. That was great!" (A 8; Satisfaction score 6)  
45  
46

47  
48 In the group without interpreter services, important language barriers were mentioned by  
49 53.7% (88/167) of the caregivers. Around 21% (35/167) explicitly described  
50 miscommunication and frustration during their visit. Some also thought of the health workers  
51 perspective and acknowledged that the situation was frustrating for them as well.  
52  
53

54  
55 Despite not having language interpretation, 44.9% (75/167) were satisfied with the  
56 communication. Of all caregivers in the group without language interpretation, 100 (59.9%)  
57 had a higher self-reported language proficiency score than the score they received during the  
58  
59  
60

1  
2  
3 standardized language screening done by the researchers. Of those, 59% did not think a  
4 professional interpreter was necessary.  
5

6  
7 A total of 58/167 (34.7%) caregivers reported that they communicated through a non-  
8 professional interpreter. Of these, 43.1% (25/58) were minors with a mean age of 12.4 (11-14  
9 IQR). The youngest non-professional interpreter was 7 years old.  
10  
11

12  
13 Some caregivers preferred professional interpreters for reasons of confidentiality whereas  
14 some favoured non-professional interpreters with the argument that they knew and trusted  
15 them or that they were more rapidly available than professional interpreters. One caregiver  
16 explained that they decided not to ask for language interpretation because they were worried  
17 about prolonged waiting times. As consequence, s/he guessed the answer to questions:  
18  
19  
20

21  
22 “I would have liked an interpreter, but I was afraid that the organization would take too  
23 long. Therefore, I did not say that I did not understand certain things and simply said  
24 ‘yes’. If I had known that there were also phone interpreters, I would have been very  
25 happy to use one.” (B 17; Satisfaction score 4)  
26  
27  
28  
29

30 A minority of 22.2% (37/167) of caregivers knew they were entitled to receive free of charge  
31 language interpretation during health consultations. A total of 61/167 (36.5%) caregivers  
32 explicitly said they would have asked for an interpreter had they known about that option.  
33  
34

35  
36 As for the overall communication, satisfaction with comprehension differed between the two  
37 study groups. Caregivers with interpreters were more likely to describe comprehension as  
38 good (85.7% (12/14) versus 68.3% (114/167)). In contrast to caregivers without interpreter  
39 services, they never classified communication as insufficient. With one exception, all parents  
40 recalled the diagnosis and therapy of their children at least partially correctly whereas some  
41 caregivers in the group without interpreters could not recall diagnosis (13.2% 22/167) or  
42 therapy (7.2% 12/167). In both groups, strong discrepancies existed between self-reported and  
43 assessed language comprehension (table 2).  
44  
45  
46  
47  
48  
49

## 50 **Expectation**

51  
52 A key factor for satisfaction were the caregivers’ personal expectations which were shaped by  
53 cultural background, health concepts, and previous experiences with health care systems  
54 (figure 1). Many caregivers were used to experiencing communication barriers in daily life.  
55  
56 Using their children as interpreters was often considered normal routine. One mother reported  
57 that her 8-year-old child translated for her and admitted:  
58  
59  
60

1  
2  
3 “I did not understand what exactly was done during the operation.”  
4

5 (B 90; Satisfaction score 6)  
6  
7

8 Nevertheless, she did not criticise that no interpreter was consulted for her and was highly  
9 satisfied. About 4.2% (7/167) of caregivers reported that they requested during this or previous  
10 health visits language interpretation at the emergency department, but their request was  
11 rejected.  
12  
13

14  
15 “I asked for an interpreter, but I was told it was too expensive and I couldn’t get one.  
16 Then I called a friend, she translated for me. But it was about very intimate things and  
17 then everyone noticed. You can’t do that!” (B 99; Satisfaction score 3)  
18  
19

20  
21 Expectations also influenced satisfaction with patient management. Depending on  
22 expectations, caregivers experienced wait times as long or short (long: 44.8% (81/181) short:  
23 15.5% (28/181)) without correlation to the objective wait time. The degree to which the wait  
24 time affected satisfaction also varied strongly. Some caregivers who expected to receive  
25 medical treatment very quickly had lower satisfaction scores. Others appreciated the 24 hours  
26 service and attended the emergency department after their working hours or on weekends,  
27 preferring to wait in the emergency department to waiting for an appointment with their  
28 pediatrician.  
29  
30

31  
32 Unmet expectations negatively influenced the relationship with the health-workers. If  
33 mismatches in health workers’ actions and caregivers’ expectations remained unsolved,  
34 satisfaction decreased. Misunderstandings and miscommunication contributed to  
35 dissatisfaction as they impeded the ability of the staff to identify and respond to the caregivers’  
36 expectations. If gaps between health workers’ actions and caregivers’ expectations could not  
37 be identified and bridged, it resulted in dissatisfaction.  
38  
39

40  
41 “I am very dissatisfied. The doctor was not a real doctor. She only talked for 1 hour and did  
42 not do a good examination nor a lab.” (B 10; Satisfaction score 1)  
43  
44

#### 45 46 47 48 49 50 51 **Health concepts**

52 Another key factor influencing satisfaction was the alignment of health workers’ and  
53 caregivers’ health concepts. The cultural background of the caregivers influenced the health  
54 concept and therefore the concept of the child’s disease and the expectation what the child  
55 needed. Satisfaction decreased if there was an unresolved mismatch between the caregivers’  
56 and the health workers’ health concepts. Most caregivers expected more diagnostics (blood  
57  
58  
59  
60

1  
2  
3 work) and therapies (antibiotics, intravenous fluids). In two cases (assessed and reported  
4 comprehension: good in both cases), the caregivers' health concept was transformed during  
5 and after the health encounter. As the outcome for the child was favourable by the time of the  
6 interview, caregivers understood that the initially expected blood work in the emergency  
7 department had not been necessary. Good communication and comprehension, a trustful  
8 relationship, and a positive health outcome mediated the transformation of the caregivers'  
9 health concept leading to alignment with the health workers' practice. The only case in the  
10 interpreter group with very low satisfaction was due to a mismatch of health concepts that  
11 could not be resolved despite good communication assured by an interpreter.  
12  
13  
14  
15  
16  
17  
18

19 "I was not satisfied with the consultation. The situation of my child was very serious,  
20 so I wished for an infusion. The nursing staff did not agree and did not do anything."  
21  
22

23 (A 14; Satisfaction score 1)  
24  
25

### 26 **Relationship**

27 A trustful and respectful health worker–caregiver relationship also represented a key factor for  
28 satisfaction (figure 1 and 2). For some caregivers, friendly and respectful treatment gave the  
29 impression that the child's medical team was competent.  
30  
31

32 "The respect! I felt taken seriously and treated well." (A 2; Satisfaction score 6)  
33  
34

35 All statements describing the relationship with the staff were positive in the interpreter group.  
36 Once established, trustful relationships also helped to keep satisfaction high despite existing  
37 language barriers; like in the following example where the caregiver was satisfied with the  
38 whole health visit:  
39  
40  
41

42 "The nursing staff and doctors are very nice and competent, they treated us with love."  
43  
44

45 (A 4; Satisfaction score 6)  
46  
47

### 48 **Patient management**

49 A fourth key factor influencing the caregiver's satisfaction was the patient management. This  
50 included waiting times, the triage system, organization of language interpretation, COVID-19  
51 restrictions, and quality improvement.  
52  
53

54 Many caregivers were not familiar with the triage system of prioritizing sicker patients. Seeing  
55 children get treated earlier although they arrived later triggered the feeling of inequity and  
56 injustice.  
57  
58  
59  
60



1  
2  
3 “Not all patients were treated the same. I don’t know if it has to do with the language.  
4 Other children got treated before us and we had to wait for so long. I felt  
5 discriminated.” (B 117; Satisfaction score 2)  
6  
7  
8

9 Due to COVID-19 restrictions only one person was allowed to stay with the child during the  
10 health visit. This was mentioned as a problem, as sometimes one caregiver knew more about  
11 the child’s health condition but the other was more language-proficient. As one had to leave,  
12 the ability to communicate was impaired:  
13  
14  
15

16 “The father translated the medical history on the phone because he speaks German  
17 well. After that, there were communication difficulties because I don’t speak German  
18 very well. I did not understand a lot of what the doctor said.” (B 87; Satisfaction Score  
19 4)  
20  
21  
22  
23

24 Most of the caregivers were very satisfied with the patient management. They also appreciated  
25 being contacted for the interview for quality improvement and receiving information about  
26 interpreters being available anytime and free of charge.  
27  
28  
29

30 “All people who can’t speak German well have difficulties with communication at the  
31 hospital and would like to have an interpreter. Thank you for your work and effort.”  
32  
33 (B 74; Satisfaction score 4)  
34  
35  
36  
37  
38  
39  
40  
41  
42  
43  
44  
45  
46  
47  
48  
49  
50  
51  
52  
53  
54  
55  
56  
57  
58  
59  
60

## Discussion

This study exploring the perception of the quality of pediatric emergency care among LLP-caregivers showed increased satisfaction of caregivers when professional language interpretation was used. The most frequently mentioned factors contributing to satisfaction, modulated by interpreter use were satisfied personal expectations, aligned health concepts, a respectful and trustful caregiver-health worker relationship, and good patient management. Caregivers were generally satisfied with their emergency department experience, but many had low expectations regarding communication quality. Overestimation of personal language skills was common and caregivers were often unaware of the option to get professional language interpretation.

In our study, caregivers' satisfaction with health care was higher when professional interpreters were involved and understanding of diagnosis and treatment improved. This is well in line with strong evidence including 3 literature reviews, describing higher patient satisfaction, fewer interpretation mistakes, and increased quality of care when using professional interpreters during health visits for LLP-patients (4, 43, 44). While all the caregivers in the interpreter group described positive effects of professional language interpretation, a total of 44.9% of LLP-caregivers in the non-interpreter group were also satisfied with the communication. Findings showed a common overestimation of the personal language proficiency, low expectations regarding communication quality, and unawareness of the option to get professional language interpretation as explanations. This is in line with other studies describing that LLP-patients overestimated their language skills (45), rarely advocated for language interpretation, and were unaware of their own right to good quality communication (27). The finding of low caregivers' expectation related to communication is a concerning safety risk. If good communication is not ensured, caregivers are not allowed to play their role as important advocates for their child's health and safety. Being used to inferior standards to the extent that a person accepts the inferior treatment as normal is described in the literature as part of internalized discrimination (46). A Norwegian study exploring satisfaction among migrant women in an obstetric hospital setting showed that patients with lowest language proficiency or education were less likely to express dissatisfaction compared to those with better education or a Norwegian husband (47). As many were unaware of their right to receive professional language interpretation, many caregivers' organized non-professional interpreters - not uncommonly minors - to bridge the language gap. This practice is unsafe and can have severe negative consequences for the patients (48-50). In the U.S, language

1  
2  
3 interpretation provided by minors is also legally prohibited by Section 1557 of the Affordable  
4 Care Act (51). These findings highlight that organization of language interpretation should not  
5 be considered a shared responsibility between caregivers and health workers but must be the  
6 full responsibility of health workers. A most recent North American publication described a  
7 significant increase of the use of professional language interpretation in a pediatric emergency  
8 department over a period of 5 years. The multidimensional strategy included staff education,  
9 data feedback, reduction of barriers to interpreter use and improved identification of patient's  
10 language for care (52). Similar long term strategies may be needed in our research context to  
11 achieve comparable results.  
12  
13  
14  
15  
16  
17  
18

19 One caregiver reported that his/her request to receive professional language interpretation was  
20 rejected by health workers, arguing that these services would be too costly. Structural  
21 discrimination of immigrant minorities including denial of services has also been described in  
22 other studies (53). Improving personal skills and attitudes of staff to identify and counter-act  
23 different forms of discrimination and to establish a diversity sensitive institutional culture is  
24 therefore key when improving the quality of care for these patients (54-56).  
25  
26  
27  
28  
29

30 Other studies also described patients' expectations as key factor for patient satisfaction.  
31 Expectations were shaped by many sociocultural factors and experiences from previous health  
32 encounters (57, 58). In this study unmet expectations were mostly due to diverging health  
33 concepts and misunderstandings about the patient management and or treatment.  
34  
35  
36  
37

38 Divergent health concepts shaped by different cultural contexts e.g. about the perceived need  
39 for antibiotics are well described and language barriers increased the difficulty to align these  
40 as shown in different studies (59, 60). Like our findings, a qualitative study from the UK on  
41 recent migrants' health beliefs, values and experiences of health care described the  
42 transformation of health concepts or at least an agreement on common ground between  
43 caregiver and health worker was achieved through effective communication, a trusting  
44 relationship, and a positive health outcome for the patient. High caregiver satisfaction was the  
45 consequence.  
46  
47  
48  
49  
50  
51

52 All statements describing the relationship with the staff were positive in the interpreter group,  
53 suggesting that the organization of an interpreter and the improved ability to communicate  
54 contributed to a trustful relationship. Also in settings with no language barriers, a strong  
55 association between patient-centred communication, the patient-provider relationship, and  
56 patient satisfaction was found (58, 61, 62).  
57  
58  
59  
60

1  
2  
3 As also described in other studies, respect, friendliness and kindness led to trustful  
4 relationships and were described as important reasons for caregivers' satisfaction with care  
5 (63). Complaints about the relationship often derived from misconceptions and  
6 misunderstandings. Transcultural communication training enabling health workers to be  
7 culturally sensitive, reduce personal assumptions and professionally address and respond to  
8 differences in health concepts has proven to reduce misunderstandings and ultimately increase  
9 patient satisfaction (54). Clear communication while managing patients including explanations  
10 of the triage system and transparent communication of waiting times are known to increase the  
11 satisfaction of patients with LLP and those fluent in the local language alike (64).  
12  
13  
14  
15  
16  
17  
18  
19

### 20 **Strengths and limitations**

21 The greatest limitation of this study was the small number of included caregivers for whom an  
22 interpreter was used. Although saturation was reached for both groups in the qualitative  
23 material, the small number did not allow inferential statistical testing of the quantitative data.  
24 The language screening was conducted by phone, which might have led to a slightly different  
25 assessment of language proficiency compared to an in-person assessment during the PED visit.  
26 An important strength of this study was the mixed method approach, allowing to measure the  
27 satisfaction with care of LLP-caregivers and other secondary outcome parameters while also  
28 allowing to explore underlying reasons for satisfaction. Through the qualitative data,  
29 additional important findings were discovered like reasons for limited caregiver self-advocacy  
30 for professional language interpretation. The validity of the study increased by the  
31 interdisciplinarity of the team including professional interpreters and study participants in  
32 designing and analysing the data.  
33  
34  
35  
36  
37  
38  
39  
40  
41  
42  
43

### 44 **Conclusion**

45 The use of professional interpreters had a positive impact on the overall satisfaction of LLP-  
46 caregivers with emergency care through modulating personal expectations, aligning health  
47 concepts, and helping to create respectful and trustful caregiver-health worker relationships.  
48 LLP-caregivers were not well-positioned to advocate for language interpretation. Health care  
49 providers must be aware of their responsibility to guarantee good quality communication to  
50 ensure equitable quality of care and patient safety.  
51  
52  
53  
54  
55  
56  
57  
58  
59  
60

### **Funding information**

The study was funded through the “Stiftung KinderInsel Bern” (formerly known as Batzebär foundation). JB received a research grant from the Edwin S.H. Leong Centre for Healthy Children, Toronto, Canada.

### **Conflict of interest**

The authors declare that they have no conflict of interest.

### **Acknowledgements**

We thank all participating families for taking part in the study and providing feedback. We thank Angelika Louis, head of the interpreting service “Comprendi” and all the intercultural interpreters for interpreting during the interviews, Miss Bohlouli for providing feedback on our interview guideline, Mr Omar and Mr Al Faraj for discussing our results, Diego Lareida and Isabelle Schwerzmann for their help with data collection, Beatrice Lussi for her help in all the administrative tasks and Ante Wind for her linguistic support.

### **Authors' contributions**

Myriam Gmünder: Conceived the study, conducted the interviews, performed data extraction, performed data analysis, drafted the initial manuscript, reviewed and revised the manuscript, and approved the final manuscript as submitted.

Noemi Gessler: Conceived the study, performed data analysis, drafted the initial manuscript, reviewed and revised the manuscript, and approved the final manuscript as submitted.

Sina Buser: Conceived the study, conducted the interviews, performed data extraction, reviewed and revised the manuscript and approved the final manuscript as submitted.

Ursula Feuz: Conceived the study, reviewed and revised the manuscript and approved the final manuscript as submitted.

Fayyaz Jabeen and Anne Jachmann: Reviewed and revised the manuscript and approved the final manuscript as submitted.

Kristina Keitel: administrative project leader, conceived the study, supervised analysis, reviewed and revised the manuscript and approved the final manuscript as submitted.

Julia Brandenberger: scientific project leader, conceived the study, supervised analysis, reviewed and revised the manuscript and approved the final manuscript as submitted.

1  
2  
3  
4  
5 ***Figures and Tables (4)***  
6  
7

8 **Figure 1:** Framework of factors influencing satisfaction

9 **Figure 2:** Framework prerequisite for a high satisfaction  
10  
11  
12

13 **Table 1:** Baseline Characteristics

14 **Table 2:** Quantitative Data  
15  
16  
17  
18  
19  
20  
21  
22  
23  
24  
25  
26  
27  
28  
29  
30  
31  
32  
33  
34  
35  
36  
37  
38  
39  
40  
41  
42  
43  
44  
45  
46  
47  
48  
49  
50  
51  
52  
53  
54  
55  
56  
57  
58  
59  
60

For peer review only

1  
2  
3 ***Supplementary data (4)***  
4

5  
6 **Supplemental figure 1:** concurrent mixed-method approach (modified from Banyard &  
7 Williams, 2007)(65).  
8

9 **Supplemental figure 2:** Flow chart - Study population  
10

11  
12  
13 **Supplemental table 1:** Checklist for MMR Manuscript preparation and review  
14

15 **Supplemental table 2:** Interview guide  
16  
17  
18  
19  
20  
21  
22  
23  
24  
25  
26  
27  
28  
29  
30  
31  
32  
33  
34  
35  
36  
37  
38  
39  
40  
41  
42  
43  
44  
45  
46  
47  
48  
49  
50  
51  
52  
53  
54  
55  
56  
57  
58  
59  
60

For peer review only

## References

1. Ramirez D, Engel KG, Tang TS. Language interpreter utilization in the emergency department setting: a clinical review. *J Health Care Poor Underserved*. 2008;19(2):352-62.
2. Cohen AL, Rivara F, Marcuse EK, McPhillips H, Davis R. Are language barriers associated with serious medical events in hospitalized pediatric patients? *Pediatrics*. 2005;116(3):575-9.
3. Lion KC, Rafton SA, Shafii J, Brownstein D, Michel E, Tolman M, et al. Association between language, serious adverse events, and length of stay among hospitalized children. *Hosp Pediatr*. 2013;3(3):219-25.
4. Flores G. The impact of medical interpreter services on the quality of health care: a systematic review. *Med Care Res Rev*. 2005;62(3):255-99.
5. Brandenberger J, Tylleskär T, Sontag K, Peterhans B, Ritz N. A systematic literature review of reported challenges in health care delivery to migrants and refugees in high-income countries - the 3C model. *BMC Public Health*. 2019;19(1):755.
6. Organization GWH. Refugee and migrant health: global competency standards for health workers. 2021.
7. Stewart MA. Effective physician-patient communication and health outcomes: a review. *Cmaj*. 1995;152(9):1423-33.
8. Agathe Blaser KG, Thomas Spang. National Programme on Migration and Health. Federal Office of Public Health; 2013.
9. (FOPH) FOoPH. Community interpreting [June 2023]. Available from: <https://www.bag.admin.ch/bag/en/home/strategie-und-politik/nationale-gesundheitsstrategien/gesundheitsliche-chancengleichheit/interkulturelles-dolmetschen.html>.
10. Nijman RG, Bressan S, Brandenberger J, Kaur D, Keitel K, Maconochie IK, et al. Update on the Coordinated Efforts of Looking After the Health Care Needs of Children and Young People Fleeing the Conflict Zone of Ukraine Presenting to European Emergency Departments-A Joint Statement of the European Society for Emergency Paediatrics and the European Academy of Paediatrics. *Front Pediatr*. 2022;10:897803.
11. Gutman CK, Cousins L, Gritton J, Klein EJ, Brown JC, Scannell J, et al. Professional Interpreter Use and Discharge Communication in the Pediatric Emergency Department. *Acad Pediatr*. 2018;18(8):935-43.
12. Karliner LS, Pérez-Stable EJ, Gregorich SE. Convenient Access to Professional Interpreters in the Hospital Decreases Readmission Rates and Estimated Hospital Expenditures for Patients With Limited English Proficiency. *Med Care*. 2017;55(3):199-206.
13. Flores G, Abreu M, Barone CP, Bachur R, Lin H. Errors of Medical Interpretation and Their Potential Clinical Consequences: A Comparison of Professional Versus Ad Hoc Versus No Interpreters. *Annals of Emergency Medicine*. 2012;60(5):545-53.
14. Blay N, Ioannou S, Seremetkoska M, Morris J, Holters G, Thomas V, et al. Healthcare interpreter utilisation: analysis of health administrative data. *BMC Health Serv Res*. 2018;18(1):348.
15. Jones L, Sheeran N, Pines R, Saunders B. How do health professionals decide whether an interpreter is needed for families in neonatal and pediatric units? *Patient Educ Couns*. 2019;102(9):1629-35.
16. Seers K, Cook L, Abel G, Schluter P, Bridgford P. Is it time to talk? Interpreter services use in general practice within Canterbury. *J Prim Health Care*. 2013;5(2):129-37.
17. Gutman CK, Klein EJ, Follmer K, Brown JC, Ebel BE, Lion KC. Deficiencies in Provider-Reported Interpreter Use in a Clinical Trial Comparing Telephonic and Video Interpretation in a Pediatric Emergency Department. *The Joint Commission Journal on Quality and Patient Safety*. 2020;46(10):573-80.



18. Lundin C, Hadziabdic E, Hjelm K. Language interpretation conditions and boundaries in multilingual and multicultural emergency healthcare. *BMC International Health and Human Rights*. 2018;18(1):23.
19. Lion KC, Gritton J, Scannell J, Brown JC, Ebel BE, Klein EJ, et al. Patterns and Predictors of Professional Interpreter Use in the Pediatric Emergency Department. *Pediatrics*. 2021;147(2).
20. Phillips CB, Travaglia J. Low levels of uptake of free interpreters by Australian doctors in private practice: secondary analysis of national data. *Aust Health Rev*. 2011;35(4):475-9.
21. Schlange SA, Palmer-Wackerly AL, Chaidez V. A Narrative Review of Medical Interpretation Services and their Effect on the Quality of Health Care. *South Med J*. 2022;115(5):317-21.
22. Lion KC, Ebel BE, Rafton S, Zhou C, Hencz P, Mangione-Smith R. Evaluation of a quality improvement intervention to increase use of telephonic interpretation. *Pediatrics*. 2015;135(3):e709-16.
23. Sina B, Noemi G, Myriam G, Ursula F, Anne J, Jabeen F, et al. The use of intercultural interpreter services at a pediatric emergency department in Switzerland. *BMC Health Serv Res*. 2022;22(1):1365.
24. Yeheskel A, Rawal S. Exploring the 'Patient Experience' of Individuals with Limited English Proficiency: A Scoping Review. *J Immigr Minor Health*. 2019;21(4):853-78.
25. Lundin C, Hadziabdic E, Hjelm K. Language interpretation conditions and boundaries in multilingual and multicultural emergency healthcare. *BMC Int Health Hum Rights*. 2018;18(1):23.
26. Jaeger FN, Pellaud N, Laville B, Klauser P. Barriers to and solutions for addressing insufficient professional interpreter use in primary healthcare. *BMC Health Serv Res*. 2019;19(1):753.
27. Pérez-Stable EJ, El-Toukhy S. Communicating with diverse patients: How patient and clinician factors affect disparities. *Patient Educ Couns*. 2018;101(12):2186-94.
28. Steinberg EM, Valenzuela-Araujo D, Zickafoose JS, Kieffer E, DeCamp LR. The "Battle" of Managing Language Barriers in Health Care. *Clin Pediatr (Phila)*. 2016;55(14):1318-27.
29. Fetters MD, Curry LA, Creswell JW. Achieving integration in mixed methods designs-principles and practices. *Health Serv Res*. 2013;48(6 Pt 2):2134-56.
30. Dowding D. Best Practices for Mixed Methods Research in the Health Sciences John W. Creswell, Ann Carroll Klassen, Vicki L. Plano Clark, Katherine Clegg Smith for the Office of Behavioral and Social Sciences Research; Qualitative Methods Overview Jo Moriarty. *Qualitative Social Work*. 2013;12(4):541-5.
31. Castro FG, Kellison JG, Boyd SJ, Kopak A. A Methodology for Conducting Integrative Mixed Methods Research and Data Analyses. *Journal of Mixed Methods Research*. 2010;4(4):342-60.
32. Hadi MA, Alldred DP, Closs SJ, Briggs M. Mixed-methods research in pharmacy practice: basics and beyond (part 1). *International Journal of Pharmacy Practice*. 2012;21(5):341-5.
33. Hussein A. The use of Triangulation in Social Sciences Research: Can qualitative and quantitative methods be combined? *Journal of Comparative Social Work*. 2009;4(1):106 - 17.
34. Thurmond VA. The point of triangulation. *J Nurs Scholarsh*. 2001;33(3):253-8.
35. Creswell JW, Clark VLP. *Designing and conducting mixed methods research*: Sage publications; 2017.
36. Ridde V, Olivier de Sardan J-P. A mixed methods contribution to the study of health public policies: complementarities and difficulties. *BMC Health Services Research*. 2015;15(3):1-8.

- 1
- 2
- 3
- 4 37. Creswell JW, Zhang W. The application of mixed methods designs to trauma research. *J Trauma Stress*. 2009;22(6):612-21.
- 5
- 6 38. Lee SD, Iott B, Banaszak-Holl J, Shih SF, Raj M, Johnson KE, et al. Application of
- 7 Mixed Methods in Health Services Management Research: A Systematic Review. *Med Care*
- 8 *Res Rev*. 2022;79(3):331-44.
- 9 39. WSLHD. Assessing the need for an interpreter [June 2023]. Available from:
- 10 [https://www.wslhd.health.nsw.gov.au/Health-Care-Interpreter-Service-/Assessing-the-need-](https://www.wslhd.health.nsw.gov.au/Health-Care-Interpreter-Service-/Assessing-the-need-for-an-Interpreter)
- 11 [for-an-Interpreter](https://www.wslhd.health.nsw.gov.au/Health-Care-Interpreter-Service-/Assessing-the-need-for-an-Interpreter).
- 12 40. Goethe-Institut 2023: Course Levels - German courses and German exams [June
- 13 2023]. Available from: <https://www.goethe.de/en/spr/kup/kon/stu.html>.
- 14 41. RUTSCHMANN O-T, SIEBER R-S, HUGLI O-W. Recommandations de la Société
- 15 suisse de médecine d'urgence et de sauvetage pour le triage dans les services d'urgences
- 16 hospitaliers en Suisse. *Bulletin des médecins suisses*. 2009;90(46):1789-90.
- 17 42. Mayring P. Qualitative content analysis - theoretical foundation, basic procedures and
- 18 software solution 2014.
- 19 43. Al Shamsi H, Almutairi AG, Al Mashrafi S, Al Kalbani T. Implications of Language
- 20 Barriers for Healthcare: A Systematic Review. *Oman Med J*. 2020;35(2):e122.
- 21 44. Karliner LS, Jacobs EA, Chen AH, Mutha S. Do professional interpreters improve
- 22 clinical care for patients with limited English proficiency? A systematic review of the
- 23 literature. *Health Serv Res*. 2007;42(2):727-54.
- 24 45. Okrainec K, Miller M, Holcroft C, Boivin JF, Greenaway C. Assessing the need for a
- 25 medical interpreter: are all questions created equal? *J Immigr Minor Health*. 2014;16(4):756-
- 26 60.
- 27 46. Jones CP. Levels of racism: a theoretic framework and a gardener's tale. *Am J Public*
- 28 *Health*. 2000;90(8):1212-5.
- 29 47. Bains S, Sundby J, Lindskog BV, Vangen S, Diep LM, Owe KM, et al. Satisfaction
- 30 with maternity care among recent migrants: an interview questionnaire-based study. *BMJ*
- 31 *Open*. 2021;11(7):e048077.
- 32 48. Bischoff A, Loutan L. Interpreting in Swiss hospitals. *Interpreting*. 2004;6:181-204.
- 33 49. Cohen SL, Moran-Ellis J, Smaje C. Children as informal interpreters in GP
- 34 consultations: pragmatics and ideology. *Sociology of Health and Illness*. 1999;21:163-86.
- 35 50. Meyer B, Pawlack B, Kliche O, editors. Family interpreters in hospitals : Good reasons
- 36 for bad practice ?2010.
- 37 51. Secretary UDoCOo. Federal Register.
- 38 52. Hartford EA, Rutman LE, Fenstermacher S, Eaton K, Ramos J, Carlin K, et al.
- 39 Improving and Sustaining Interpreter Use Over 5 Years in a Pediatric Emergency Department.
- 40 *Pediatrics*. 2023.
- 41 53. Pollock G, Newbold B, editors. PERCEPTIONS OF DISCRIMINATION IN
- 42 HEALTH SERVICES EXPERIENCED BY IMMIGRANT MINORITIES IN
- 43 ONTARIO 2015.
- 44 54. Taylor C, Bengner JR. Patient satisfaction in emergency medicine. *Emerg Med J*.
- 45 2004;21(5):528-32.
- 46 55. Boudreaux ED, O'Hea EL. Patient satisfaction in the Emergency Department: a review
- 47 of the literature and implications for practice. *J Emerg Med*. 2004;26(1):13-26.
- 48 56. Batbaatar E, Dorjdagva J, Luvsannyam A, Savino MM, Amenta P. Determinants of
- 49 patient satisfaction: a systematic review. *Perspect Public Health*. 2017;137(2):89-101.
- 50 57. Lakin K, Kane S. Peoples' expectations of healthcare: A conceptual review and
- 51 proposed analytical framework. *Social Science & Medicine*. 2022;292:114636.
- 52 58. Larson E, Sharma J, Bohren MA, Tunçalp Ö. When the patient is the expert: measuring
- 53 patient experience and satisfaction with care. *Bull World Health Organ*. 2019;97(8):563-9.
- 54
- 55
- 56
- 57
- 58
- 59
- 60

- 1  
2  
3 59. Özcebe H, Üner S, Karadag O, Daryani A, Gershuni O, Czabanowska K, et al.  
4 Perspectives of physicians and pharmacists on rational use of antibiotics in Turkey and among  
5 Turkish migrants in Germany, Sweden and the Netherlands: a qualitative study. *BMC Prim*  
6 *Care*. 2022;23(1):29.  
7  
8 60. Herrero-Arias R, Diaz E. A qualitative study on the experiences of southern European  
9 immigrant parents navigating the Norwegian healthcare system. *Int J Equity Health*.  
10 2021;20(1):42.  
11 61. Boissy A, Windover AK, Bokar D, Karafa M, Neuendorf K, Frankel RM, et al.  
12 Communication Skills Training for Physicians Improves Patient Satisfaction. *J Gen Intern*  
13 *Med*. 2016;31(7):755-61.  
14 62. Drossman DA, Chang L, Deutsch JK, Ford AC, Halpert A, Kroenke K, et al. A Review  
15 of the Evidence and Recommendations on Communication Skills and the Patient-Provider  
16 Relationship: A Rome Foundation Working Team Report. *Gastroenterology*.  
17 2021;161(5):1670-88.e7.  
18 63. Brandenberger J, Sontag K, Duchêne-Lacroix C, Jaeger FN, Peterhans B, Ritz N.  
19 Perspective of asylum-seeking caregivers on the quality of care provided by a Swiss paediatric  
20 hospital: a qualitative study. *BMJ Open*. 2019;9(9):e029385.  
21 64. Lee S, Groß SE, Pfaff H, Dresen A. Waiting time, communication quality, and patient  
22 satisfaction: An analysis of moderating influences on the relationship between perceived  
23 waiting time and the satisfaction of breast cancer patients during their inpatient stay. *Patient*  
24 *Education and Counseling*. 2020;103(4):819-25.  
25 65. Banyard VL, Williams LM. Women's voices on recovery: A multi-method study of the  
26 complexity of recovery from child sexual abuse. *Child Abuse & Neglect*. 2007;31(3):275-90.  
27  
28  
29  
30  
31  
32  
33  
34  
35  
36  
37  
38  
39  
40  
41  
42  
43  
44  
45  
46  
47  
48  
49  
50  
51  
52  
53  
54  
55  
56  
57  
58  
59  
60

**Table 1:** Baseline Characteristics

|                                               | With interpreter (14)     |                      |                  |                      | Without interpreter (167) |                      |                  |                      |
|-----------------------------------------------|---------------------------|----------------------|------------------|----------------------|---------------------------|----------------------|------------------|----------------------|
|                                               | N/ years                  |                      | %                |                      | N/ years                  |                      | %                |                      |
| <b>Most frequent nationalities</b>            | ER                        | 6                    | 42.9             |                      | SY                        | 37                   | 22.2             |                      |
|                                               | SY                        | 3                    | 21.4             |                      | ER                        | 26                   | 15.6             |                      |
|                                               | LK                        | 2                    | 14.3             |                      | PT                        | 13                   | 7.8              |                      |
|                                               | AF                        | 1                    | 7.1              |                      | AF                        | 11                   | 6.6              |                      |
|                                               | IQ                        | 1                    | 7.1              |                      | TR                        | 10                   | 6                |                      |
|                                               | SO                        | 1                    | 7.1              |                      | LK                        | 9                    | 5.4              |                      |
| <b>Most frequent languages</b>                | Tigrinya                  | 6                    | 42.9             |                      | Arabic                    | 38                   | 22.6             |                      |
|                                               | Arabic                    | 3                    | 21.4             |                      | Tigrinya                  | 25                   | 15               |                      |
|                                               | Tamil                     | 2                    | 14.3             |                      | Kurdish                   | 16                   | 9.5              |                      |
|                                               | Dari                      | 1                    | 7.1              |                      | Portuguese                | 14                   | 8.4              |                      |
|                                               | Kurmanji                  | 1                    | 7.1              |                      | Turkish                   | 13                   | 7.8              |                      |
|                                               | Somali                    | 1                    | 7.1              |                      | Albanish                  | 12                   | 7.2              |                      |
| <b>Language proficiency</b>                   | <i>estimated</i>          | <i>self-reported</i> | <i>estimated</i> | <i>self-reported</i> | <i>estimated</i>          | <i>self-reported</i> | <i>estimated</i> | <i>self-reported</i> |
| - A1                                          | 7                         | 5                    | 50               | 35.7                 | 66                        | 30                   | 39.5             | 18                   |
| - A2                                          | 7                         | 4                    | 50               | 28.6                 | 100                       | 35                   | 59.9             | 21                   |
| - B1                                          | 0                         | 5                    | 0                | 35.7                 | 1                         | 45                   | 0.6              | 26.9                 |
| - B2                                          |                           |                      |                  |                      |                           | 39                   |                  | 23.4                 |
| - C1                                          |                           |                      |                  |                      |                           | 12                   |                  | 7.2                  |
| - C2                                          |                           |                      |                  |                      |                           | 4                    |                  | 2.4                  |
| *missing                                      |                           |                      |                  |                      |                           | 2                    |                  | 1.2                  |
| <b>Duration of stay in CH</b><br>(min – max)  | 5.07 years<br>(20d – 12y) |                      |                  |                      | 6.71 years<br>(6d – 30y)  |                      |                  |                      |
| <b>Triage score:</b>                          |                           |                      |                  |                      |                           |                      |                  |                      |
| - 1-3: urgent                                 | 8                         |                      | 57.1             |                      | 42                        |                      | 25.1             |                      |
| - 4-5: non-urgent                             | 6                         |                      | 42.9             |                      | 124                       |                      | 74.3             |                      |
| *missing                                      | 0                         |                      |                  |                      | 1                         |                      | 0.6              |                      |
| <b>Highest education degree of caregiver:</b> |                           |                      |                  |                      |                           |                      |                  |                      |
| - Illiterate                                  | 2                         |                      | 14.3             |                      | 21                        |                      | 12.6             |                      |
| - Primary School                              | 6                         |                      | 42.9             |                      | 56                        |                      | 33.5             |                      |
| - Secondary School                            | 5                         |                      | 35.7             |                      | 64                        |                      | 38.3             |                      |
| - University                                  | 0                         |                      | 0                |                      | 26                        |                      | 15.6             |                      |
| <b>Asylum permission/Residence status:</b>    |                           |                      |                  |                      |                           |                      |                  |                      |
| - N-Permit                                    | 0                         |                      | 0                |                      | 3                         |                      | 1.8              |                      |
| - F-Permit                                    | 5                         |                      | 35.7             |                      | 33                        |                      | 19.8             |                      |
| - B-permit                                    | 6                         |                      | 42.9             |                      | 93                        |                      | 55.7             |                      |
| - C-permit                                    | 1                         |                      | 7.1              |                      | 25                        |                      | 15               |                      |
| - not known                                   | 1                         |                      | 7.1              |                      | 9                         |                      | 5.4              |                      |

y = year, d = day, N-permit = asylum-seeker, F-permit = temporarily admitted refugee, B-permit = temporary resident foreign nationals, C-permit = settlement permit

**Table 2: Quantitative Data**

|                                                 |                                            | With interpreter (14) |       | Without interpreter (167) |       |      |
|-------------------------------------------------|--------------------------------------------|-----------------------|-------|---------------------------|-------|------|
|                                                 |                                            | N/ mean               | %/ SD | N/ mean                   | %/ SD |      |
| <b>General satisfaction<sup>o</sup></b>         | Mean/ SD                                   | 5.46                  | 1.39  | 4.8                       | 1.59  |      |
|                                                 | 1                                          | 1                     | 7.1   | 11                        | 6.6   |      |
|                                                 | 2                                          | 0                     | 0     | 11                        | 6.6   |      |
|                                                 | 3                                          | 0                     | 0     | 12                        | 7.2   |      |
|                                                 | 4                                          | 0                     | 0     | 16                        | 9.6   |      |
|                                                 | 5                                          | 2                     | 14.3  | 31                        | 18.6  |      |
|                                                 | 6                                          | 10                    | 71.4  | 84                        | 50.3  |      |
|                                                 | *missing                                   | 1                     | 7.1   | 2                         | 1.2   |      |
| <b>Communication</b>                            |                                            |                       |       |                           |       |      |
| <b>Language barrier</b>                         | yes                                        | NA                    | NA    | 88                        | 52.7  |      |
|                                                 | - A1                                       | NA                    | NA    | 43                        | 48.9  |      |
|                                                 | - A2                                       |                       |       | 45                        | 51.1  |      |
|                                                 | no                                         | NA                    | NA    | 75                        | 44.9  |      |
|                                                 | - A1                                       | NA                    | NA    | 18                        | 24    |      |
|                                                 | - A2                                       |                       |       | 54                        | 72    |      |
|                                                 | - B1                                       |                       |       | 1                         | 1.3   |      |
|                                                 | *missing                                   | NA                    | NA    | 4                         | 2.4   |      |
| <b>Non-professional Interpreter</b>             | yes                                        | NA                    | NA    | 58                        | 34.7  |      |
|                                                 | - siblings                                 | NA                    | NA    | 8                         | 13.8  |      |
|                                                 | - family member                            |                       |       | 10                        | 17.2  |      |
|                                                 | - friend                                   |                       |       | 17                        | 29.3  |      |
|                                                 | - hospital staff                           |                       |       | 5                         | 8.6   |      |
|                                                 | - patient                                  |                       |       | 17                        | 29.3  |      |
|                                                 | - other                                    |                       |       | 1                         | 1.7   |      |
| Of which minors                                 | NA                                         | NA                    | 25    | 43.1                      |       |      |
|                                                 | no                                         | NA                    | NA    | 105                       | 62.9  |      |
|                                                 | *missing                                   | NA                    | NA    | 4                         | 2.4   |      |
| <b>Self-reported and assessed comprehension</b> |                                            |                       |       |                           |       |      |
| <b>Understandable Information</b>               | Self-reported comprehension = good         |                       | 12    | 85.7                      | 114   | 68.3 |
|                                                 | <b>Correct Diagnosis</b>                   | yes                   | 4     | 33.3                      | 49    | 43   |
|                                                 |                                            | partial               | 8     | 66.7                      | 45    | 39.5 |
|                                                 |                                            | insufficient          | 0     | 0                         | 18    | 15.8 |
|                                                 |                                            | *missing              |       |                           | 2     | 1.8  |
|                                                 | <b>Correct Therapy</b>                     | yes                   | 5     | 41.7                      | 47    | 41.2 |
|                                                 |                                            | partial               | 6     | 50                        | 55    | 48.3 |
|                                                 |                                            | insufficient          | 1     | 8.3                       | 8     | 7    |
|                                                 |                                            | *missing              |       |                           | 4     | 3.5  |
|                                                 | Self-reported comprehension = partial      |                       | 2     | 14.3                      | 36    | 21.6 |
|                                                 | <b>Correct Diagnosis</b>                   | yes                   | 2     | 100                       | 15    | 41.7 |
|                                                 |                                            | partial               | 0     | 0                         | 17    | 47.2 |
|                                                 |                                            | no                    | 0     | 0                         | 3     | 8.3  |
|                                                 |                                            | *missing              |       |                           | 1     | 2.8  |
|                                                 | <b>Correct Therapy</b>                     | yes                   | 0     | 0                         | 16    | 44.4 |
|                                                 |                                            | partial               | 2     | 100                       | 15    | 41.7 |
|                                                 |                                            | insufficient          | 0     | 0                         | 4     | 11.1 |
|                                                 |                                            | *missing              |       |                           | 1     | 2.8  |
|                                                 | Self-reported comprehension = insufficient |                       | 0     | 0                         | 11    | 6.6  |
|                                                 | <b>Correct Diagnosis</b>                   | yes                   | 0     | 0                         | 4     | 36.4 |
| partial                                         |                                            | 0                     | 0     | 6                         | 54.5  |      |
| insufficient                                    |                                            | 0                     | 0     | 1                         | 9.1   |      |
| <b>Correct Therapy</b>                          | yes                                        | 0                     | 0     | 4                         | 36.4  |      |
|                                                 | partial                                    | 0                     | 0     | 7                         | 63.6  |      |
|                                                 | insufficient                               | 0                     | 0     | 0                         | 0     |      |
|                                                 | *missing                                   | 0                     | 0     | 6                         | 3.6   |      |

| Interpreter use                         |          |    |      |     |      |
|-----------------------------------------|----------|----|------|-----|------|
| Interpreter – sensible and helpful?     | yes      | 14 | 100  | NA  | NA   |
| Interpreter desired                     | yes      | NA | NA   | 89  | 53.3 |
|                                         | no       | NA | NA   | 74  | 44.3 |
|                                         | *missing | NA | NA   | 4   | 2.4  |
| Knowledge about interpreter entitlement | yes      | 7  | 50   | 37  | 22.2 |
|                                         | no       | 6  | 42.9 | 125 | 74.9 |
|                                         | *missing | 1  | 7.1  | 5   | 3    |

°General Satisfaction: 1= not satisfied, 6= very satisfied  
NA = not applicable

For peer review only

1  
2  
3  
4  
5  
6  
7  
8  
9  
10  
11  
12  
13  
14  
15  
16  
17  
18  
19  
20  
21  
22  
23  
24  
25  
26  
27  
28  
29  
30  
31  
32  
33  
34  
35  
36  
37  
38  
39  
40  
41  
42  
43  
44  
45  
46  
47  
48  
49  
50  
51  
52  
53  
54  
55  
56  
57  
58  
59  
60

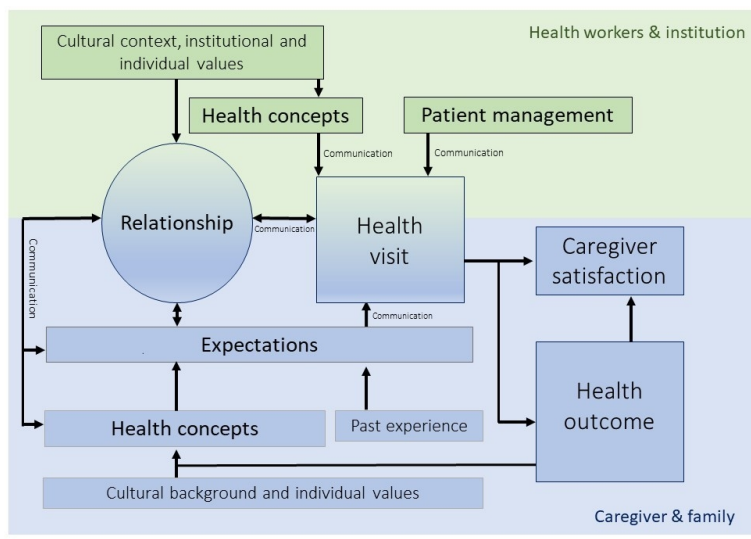

Framework of factors influencing satisfaction

338x190mm (96 x 96 DPI)

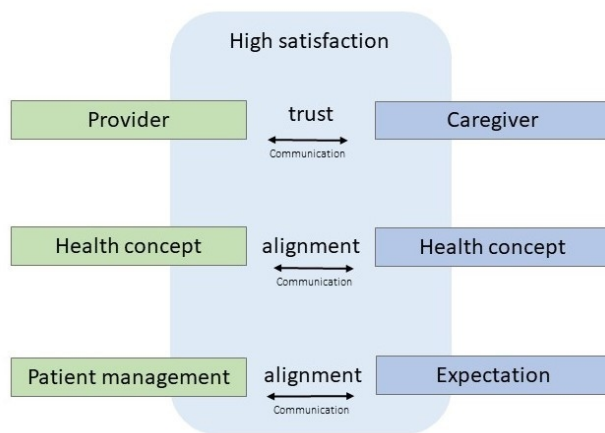

Framework prerequisite for a high satisfaction

268x166mm (96 x 96 DPI)



1  
2  
3  
4  
5  
6  
7  
8  
9  
10  
11  
12  
13  
14  
15  
16  
17  
18  
19  
20  
21  
22  
23  
24  
25  
26  
27  
28  
29  
30  
31  
32  
33  
34  
35  
36  
37  
38  
39  
40  
41  
42  
43  
44  
45  
46  
47  
48  
49  
50  
51  
52  
53  
54  
55  
56  
57  
58  
59  
60

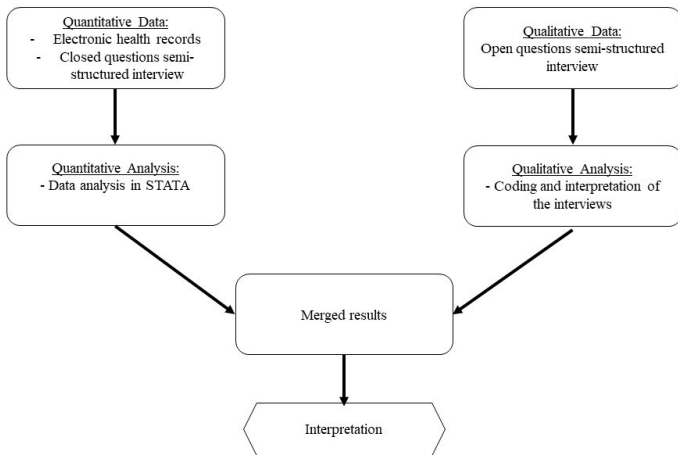

338x190mm (96 x 96 DPI)

1  
2  
3  
4  
5  
6  
7  
8  
9  
10  
11  
12  
13  
14  
15  
16  
17  
18  
19  
20  
21  
22  
23  
24  
25  
26  
27  
28  
29  
30  
31  
32  
33  
34  
35  
36  
37  
38  
39  
40  
41  
42  
43  
44  
45  
46  
47  
48  
49  
50  
51  
52  
53  
54  
55  
56  
57  
58  
59  
60

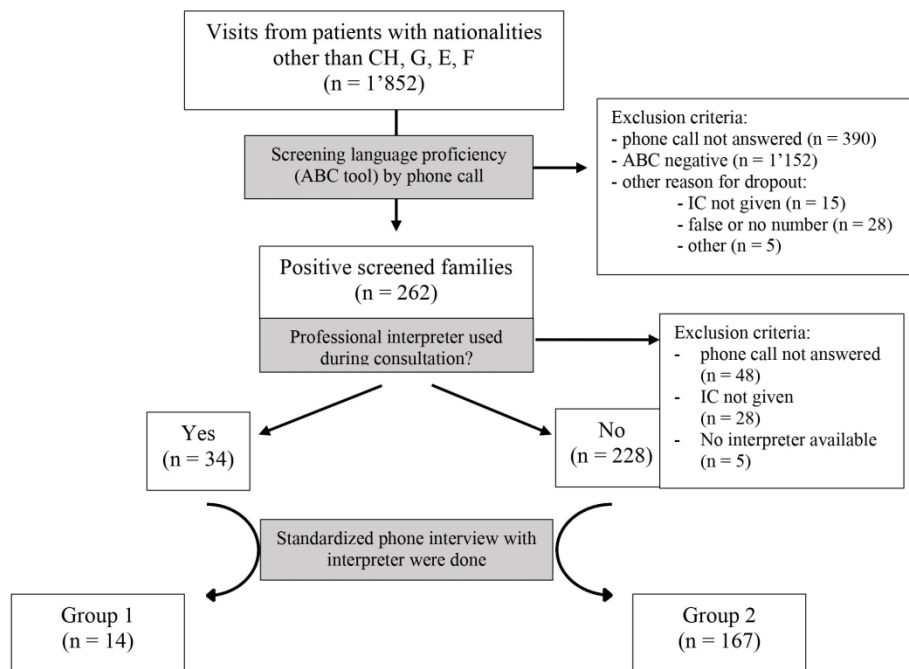

189x160mm (300 x 300 DPI)

**Supplemental table 1: Checklist for MMR Manuscript preparation and review**

|                                                                 |                                                                                                                                                                                                                                                                                                                                                                                                                                                                                                                                                                                                                                                                                                                                                                                                                                                                                                                                                                                                                                                                      |
|-----------------------------------------------------------------|----------------------------------------------------------------------------------------------------------------------------------------------------------------------------------------------------------------------------------------------------------------------------------------------------------------------------------------------------------------------------------------------------------------------------------------------------------------------------------------------------------------------------------------------------------------------------------------------------------------------------------------------------------------------------------------------------------------------------------------------------------------------------------------------------------------------------------------------------------------------------------------------------------------------------------------------------------------------------------------------------------------------------------------------------------------------|
| Rational and description of MMR design                          | <ul style="list-style-type: none"> <li><input type="checkbox"/> Provide a clear statement of the study purpose</li> <li><input type="checkbox"/> Explicitly describe the MMR design in accordance with <a href="#">Creswell's (2015)</a> typology and use a diagram to illustrate the relationship and sequence of qualitative and quantitative research components</li> <li><input type="checkbox"/> Justify why the MMR design is appropriate for meeting the study purpose</li> </ul>                                                                                                                                                                                                                                                                                                                                                                                                                                                                                                                                                                             |
| Transparency in describing method details                       | <ul style="list-style-type: none"> <li><input type="checkbox"/> Describe the study population(s) and sample(s; e.g., who, what, how many)</li> <li><input type="checkbox"/> Describe the sampling procedures (including inclusion and exclusion criteria, recruitment)</li> <li><input type="checkbox"/> Describe qualitative data collection processes (how often data were collected, who collected the data, what kind of data collection instruments were used, how data were recorded—e.g., notes, transcripts)</li> <li><input type="checkbox"/> Describe quantitative data collection processes (how often data were collected, who collected the data, what kind of data collection instruments were used measurements, validity/reliability)</li> <li><input type="checkbox"/> Describe qualitative data analysis processes (coding, single or multiple coders, replication logic, credibility)</li> <li><input type="checkbox"/> Describe quantitative data analysis procedures (missing data and how they are handled, statistical tests used)</li> </ul> |
| Integration of qualitative and quantitative research components | <ul style="list-style-type: none"> <li><input type="checkbox"/> Interpret qualitative analysis results with appropriate quotes if necessary</li> <li><input type="checkbox"/> Interpret quantitative analysis results in consideration of statistical significance, selection bias, and threats to validity</li> <li><input type="checkbox"/> Compare qualitative and quantitative results</li> <li><input type="checkbox"/> Address divergencies and inconsistencies between qualitative and quantitative results</li> </ul>                                                                                                                                                                                                                                                                                                                                                                                                                                                                                                                                        |

Only

## Supplemental table 2: Interview guide

|                                          |                                                                                                                                                                                                                                                                               |                                                                                                                                                                                                                                                                                                                                                                                                                                                                                                                                                                                                                                                                                                                                     |
|------------------------------------------|-------------------------------------------------------------------------------------------------------------------------------------------------------------------------------------------------------------------------------------------------------------------------------|-------------------------------------------------------------------------------------------------------------------------------------------------------------------------------------------------------------------------------------------------------------------------------------------------------------------------------------------------------------------------------------------------------------------------------------------------------------------------------------------------------------------------------------------------------------------------------------------------------------------------------------------------------------------------------------------------------------------------------------|
| <b>Introduction</b>                      | Introduction (Name, doctoral Student, Interpreter)<br>Phoneinterview to quality improvement at NZKJ<br>Double check right person?<br><br>Confidentiality/ Anonymisation<br>Informed consent                                                                                   | Hello Ms/Mr XX, my name is YY and Mrs/Mr ZZ will translate.<br>Phoneinterview for quality improvement at the NZKJ, duration approx. 10-15 minutes<br><br>Who was at the emergency department with your child on the XX(date)? If present, can your partner speak better G/E/F?<br><br>Your information will be treated confidentially and anonymized.<br>Do you mind if I ask you a few questions?                                                                                                                                                                                                                                                                                                                                  |
| <b>Communication without interpreter</b> | Security in D/E/F language? Scale 1-6<br>Spoken language at emergency department?<br>Difficulties of comprehension?<br><br>Someone translated?<br>Age of non-professional interpreter?<br>Wished for interpreter?<br>Entitlement to interpreter                               | How confident do you feel in G/E/F language on a scale of 1-6? (1 = very uncertain, 6 = very certain)?<br>What language did you use talking to the doctor/nurse?<br>In your view, were there any linguistic difficulties in comprehension?<br><br>Did anyone else (child, relative, co-worker,...) translate during your visit?<br>How old was he/she who translated?<br>Would you have liked an interpreter?<br>Do you know that you may always ask for an interpreter in the hospital?                                                                                                                                                                                                                                            |
| <b>Communication with interpreter</b>    | Native language?<br>Confident in D/E/F language? Scale 1-6<br><br>Interpreter:<br>Interpreter on site or phone?<br>Who whised for an interpreter?<br>Entitlement to interpreter<br>When was interpreter used?<br>Communication before?<br>How often?<br>Sensible and helpful? | What is your native language?<br>How confident do you feel in G/E/F language on a scale of 1-6? (1 = very uncertain, 6 = very certain)?<br><br>During your visit, an interpreter was translating:<br>Was the interpreter on site or was translation done via telephone?<br>Did you ask for an interpreter? Or was the interpreter organized by the hospital staff?<br>Do you know that you may always ask for an interpreter in the hospital?<br>At what point was the interpreter brought in?<br>How was communicated before?<br>How often was the interpreter needed?<br>Did you also request an interpreter at any other time during your consultation?<br>Do you think that involving the interpreter was sensible and helpful? |
| <b>Satisfaction</b>                      | Satisfaction from 1-6? Why?<br><br>Diagnose?<br>Informations?<br>Therapy? Dosage?<br><br>What was missing? Improvement proposal?<br>Particularly good?<br>Come back to NZKJ?                                                                                                  | On a scale of 1-6, how satisfied were you with your visit to the emergency department? (1 = very dissatisfied, 6 = very satisfied). Why?<br><br>What was the diagnosis of your child?<br>Was the information provided during your visit clear and understandable? → If no: why not?<br>What did your child receive as therapy? What was the dosage?<br><br>What would you have wished differently? Any suggestions for improvement?<br>What did you particularly like?<br>If you had another emergency with one of your children, would you feel comfortable coming back to the NZKJ?                                                                                                                                               |
| <b>Personal facts</b>                    | Arrival in CH?<br>Age?<br>Education?<br>Current profession?<br>Asylum status?                                                                                                                                                                                                 | How long have you been in Switzerland?<br>How old are you?<br>What is your highest graduation?<br>What is your current profession?<br>What is your current residency/ asylum status?                                                                                                                                                                                                                                                                                                                                                                                                                                                                                                                                                |
| <b>Wrap up</b>                           | Answered all the questions                                                                                                                                                                                                                                                    | From my point of view, you answered all my questions. Thank you for your valuable time and answers.                                                                                                                                                                                                                                                                                                                                                                                                                                                                                                                                                                                                                                 |

|                            |                          |                                                                            |
|----------------------------|--------------------------|----------------------------------------------------------------------------|
|                            | Additions?<br>Questions? | Do you have any additions or questions?                                    |
| <b>Thanks and farewell</b> | Thanks<br>Farewell       | Thank you very much for answering my questions.<br>I wish you all the best |

For peer review only

1  
2  
3  
4  
5  
6  
7  
8  
9  
10  
11  
12  
13  
14  
15  
16  
17  
18  
19  
20  
21  
22  
23  
24  
25  
26  
27  
28  
29  
30  
31  
32  
33  
34  
35  
36  
37  
38  
39  
40  
41  
42  
43  
44  
45  
46

**Supplemental table 1: Checklist for MMR Manuscript preparation and review**

|                                                                 |                                                                                                                                                                                                                                             |
|-----------------------------------------------------------------|---------------------------------------------------------------------------------------------------------------------------------------------------------------------------------------------------------------------------------------------|
| Rational and description of MMR design                          | <input type="checkbox"/> Provide a clear statement of the study purpose                                                                                                                                                                     |
|                                                                 | <input type="checkbox"/> Explicitly describe the MMR design in accordance with <a href="#">Creswell's (2015)</a> typology and use a diagram to illustrate the relationship and sequence of qualitative and quantitative research components |
|                                                                 | <input type="checkbox"/> Justify why the MMR design is appropriate for meeting the study purpose                                                                                                                                            |
| Transparency in describing method details                       | <input type="checkbox"/> Describe the study population(s) and sample(s; e.g., who, what, how many)                                                                                                                                          |
|                                                                 | <input type="checkbox"/> Describe the sampling procedures (including inclusion and exclusion criteria, recruitment)                                                                                                                         |
|                                                                 | <input type="checkbox"/> Describe qualitative data collection processes (how often data were collected, who collected the data, what kind of data collection instruments were used, how data were recorded—e.g., notes, transcripts)        |
|                                                                 | <input type="checkbox"/> Describe quantitative data collection processes (how often data were collected, who collected the data, what kind of data collection instruments were used measurements, validity/reliability)                     |
|                                                                 | <input type="checkbox"/> Describe qualitative data analysis processes (coding, single or multiple coders, replication logic, credibility)                                                                                                   |
|                                                                 | <input type="checkbox"/> Describe quantitative data analysis procedures (missing data and how they are handled, statistical tests used)                                                                                                     |
| Integration of qualitative and quantitative research components | <input type="checkbox"/> Interpret qualitative analysis results with appropriate quotes if necessary                                                                                                                                        |
|                                                                 | <input type="checkbox"/> Interpret quantitative analysis results in consideration of statistical significance, selection bias, and threats to validity                                                                                      |
|                                                                 | <input type="checkbox"/> Compare qualitative and quantitative results                                                                                                                                                                       |
|                                                                 | <input type="checkbox"/> Address divergencies and inconsistencies between qualitative and quantitative results                                                                                                                              |

**Reference:**

38. Lee SD, Iott B, Banaszak-Holl J, Shih SF, Raj M, Johnson KE, et al. Application of Mixed Methods in Health Services Management Research: A Systematic Review. *Med Care Res Rev.* 2022;79(3):331-44.

# BMJ Open

## Caregivers with limited language proficiency and their satisfaction with pediatric emergency care related to the use of professional interpreters – a mixed methods study

|                                 |                                                                                                                                                                                                                                                                                                                                                                                                                                                                                                                                                                                                                                                                                                                                                                                                                      |
|---------------------------------|----------------------------------------------------------------------------------------------------------------------------------------------------------------------------------------------------------------------------------------------------------------------------------------------------------------------------------------------------------------------------------------------------------------------------------------------------------------------------------------------------------------------------------------------------------------------------------------------------------------------------------------------------------------------------------------------------------------------------------------------------------------------------------------------------------------------|
| Journal:                        | <i>BMJ Open</i>                                                                                                                                                                                                                                                                                                                                                                                                                                                                                                                                                                                                                                                                                                                                                                                                      |
| Manuscript ID                   | bmjopen-2023-077716.R1                                                                                                                                                                                                                                                                                                                                                                                                                                                                                                                                                                                                                                                                                                                                                                                               |
| Article Type:                   | Original research                                                                                                                                                                                                                                                                                                                                                                                                                                                                                                                                                                                                                                                                                                                                                                                                    |
| Date Submitted by the Author:   | 16-Nov-2023                                                                                                                                                                                                                                                                                                                                                                                                                                                                                                                                                                                                                                                                                                                                                                                                          |
| Complete List of Authors:       | Gmünder, Myriam; Inselspital Universitätsspital Bern Kinderklinik, emergency department<br>Gessler, Noemi; Inselspital Universitätsspital Bern Kinderklinik, emergency department<br>Buser, Sina; Inselspital Universitätsspital Bern Kinderklinik, emergency department<br>Feuz, Ursula; Inselspital Universitätsspital Bern Kinderklinik, emergency department<br>Fayyaz, Jabeen; The Hospital for Sick Children, emergency department<br>Jachmann, Anne; Inselspital Universitätsspital Bern Kinderklinik, Emergency Medicine<br>Keitel, Kristina; Inselspital Universitätsspital Bern, Paediatric Emergency Department<br>Brandenberger, Julia; Inselspital Universitätsspital Bern Kinderklinik, emergency department; University of Toronto Faculty of Medicine, Edwin S. H. Leong Centre for Healthy Children |
| <b>Primary Subject Heading</b>: | Communication                                                                                                                                                                                                                                                                                                                                                                                                                                                                                                                                                                                                                                                                                                                                                                                                        |
| Secondary Subject Heading:      | Paediatrics, Emergency medicine                                                                                                                                                                                                                                                                                                                                                                                                                                                                                                                                                                                                                                                                                                                                                                                      |
| Keywords:                       | ACCIDENT & EMERGENCY MEDICINE, Health Equity, PAEDIATRICS                                                                                                                                                                                                                                                                                                                                                                                                                                                                                                                                                                                                                                                                                                                                                            |
|                                 |                                                                                                                                                                                                                                                                                                                                                                                                                                                                                                                                                                                                                                                                                                                                                                                                                      |

SCHOLARONE™  
Manuscripts



I, the Submitting Author has the right to grant and does grant on behalf of all authors of the Work (as defined in the below author licence), an exclusive licence and/or a non-exclusive licence for contributions from authors who are: i) UK Crown employees; ii) where BMJ has agreed a CC-BY licence shall apply, and/or iii) in accordance with the terms applicable for US Federal Government officers or employees acting as part of their official duties; on a worldwide, perpetual, irrevocable, royalty-free basis to BMJ Publishing Group Ltd ("BMJ") its licensees and where the relevant Journal is co-owned by BMJ to the co-owners of the Journal, to publish the Work in this journal and any other BMJ products and to exploit all rights, as set out in our [licence](#).

The Submitting Author accepts and understands that any supply made under these terms is made by BMJ to the Submitting Author unless you are acting as an employee on behalf of your employer or a postgraduate student of an affiliated institution which is paying any applicable article publishing charge ("APC") for Open Access articles. Where the Submitting Author wishes to make the Work available on an Open Access basis (and intends to pay the relevant APC), the terms of reuse of such Open Access shall be governed by a Creative Commons licence – details of these licences and which [Creative Commons](#) licence will apply to this Work are set out in our licence referred to above.

Other than as permitted in any relevant BMJ Author's Self Archiving Policies, I confirm this Work has not been accepted for publication elsewhere, is not being considered for publication elsewhere and does not duplicate material already published. I confirm all authors consent to publication of this Work and authorise the granting of this licence.



1  
2  
3 **Caregivers with limited language proficiency and their satisfaction with**  
4  
5  
6 **pediatric emergency care related to the use of professional interpreters – a**  
7  
8 **mixed methods study**  
9

10 Myriam Gmünder MD<sup>1\*</sup>, Noemi Gessler MD<sup>1\*</sup>, Sina Buser MD<sup>1</sup>, Ursula Feuz<sup>1</sup>, Jabeen Fayyaz<sup>2</sup>,  
11  
12 Anne Jachmann MD<sup>3</sup>, Kristina Keitel MD PhD<sup>1+</sup> and Julia Brandenberger MD PhD<sup>1, 4+</sup>  
13  
14  
15

16  
17  
18 <sup>1</sup> Pediatric Emergency department, University Hospital of Bern, Bern, Switzerland  
19

20 <sup>2</sup> Division of Pediatric Emergency Medicine, Hospital for Sick Children, Toronto, Ontario,  
21  
22 Canada  
23

24 <sup>3</sup> Emergency Department, University Hospital of Bern, Bern, Switzerland  
25

26 <sup>4</sup> Edwin S.H. Leong Centre for Healthy Children, University of Toronto, Toronto, ON, Canada  
27  
28  
29

30  
31  
32 \* shared first authors; + shared last authors  
33  
34  
35

36 Corresponding author  
37

38 Julia Brandenberger, MD PhD  
39

40 Notfallzentrum für Kinder und Jugendliche (NZKJ)  
41

42 University Hospital of Bern, Bern, Switzerland  
43

44 Freiburgstrasse 15, 3010 Bern, Switzerland  
45

46 Phone: +41 31 632 92 77  
47

48 E-mail: [julia.brandenberger@hotmail.com](mailto:julia.brandenberger@hotmail.com)  
49  
50  
51  
52  
53  
54

55 **Supported by:** the “Stiftung KinderInsel Bern” (formerly known as Batzebär foundation) and  
56 the Edwin S.H. Leong Centre for Healthy Children, Toronto, Canada to JB.  
57

58 **COI:** The authors declare that they have no conflict of interest.  
59  
60

1  
2  
3 **Keywords:** migrant health; children; immigrant; refugee, interpreter, emergency department,  
4 Europe, equity, communication, limited language proficiency, self-advocacy  
5  
6

## 7 **Abstract**

### 8 **Objectives**

9  
10 Communication is a main challenge in migrant health and essential for patient safety. The aim  
11 of this study was to describe the satisfaction of caregivers with limited language proficiency  
12 (LLP) with care related to the use of interpreters and to explore underlying and interacting  
13 factors influencing satisfaction and self-advocacy.  
14  
15  
16  
17

### 18 **Design**

19 A mixed-methods study

### 20 **Setting**

21 Pediatric emergency department (PED) at a tertiary care hospital in Bern, Switzerland.  
22  
23  
24  
25

### 26 **Participants and methods**

27 Caregivers visiting the PED were systematically screened for their language proficiency.  
28 Semi-structured interviews were conducted with all LLP-caregivers agreeing to participate  
29 and their administrative data was extracted.  
30  
31  
32

### 33 **Results**

34 The study included 181 caregivers, 14 of whom received professional language interpretation.  
35 Caregivers who were assisted by professional interpretation services were more satisfied than  
36 those without (5.5[SD] ±1.4 versus 4.8[SD] ±1.6). Satisfaction was influenced by 5 main  
37 factors (relationship with health workers, patient management, alignment of health concepts,  
38 personal expectations, health outcome of the patient) which were modulated by  
39 communication. Of all LLP-caregivers without professional interpretation, 44.9% were  
40 satisfied with communication due to low expectations regarding the quality of communication,  
41 unawareness of the availability of professional interpretation, and overestimation of own  
42 language skills, resulting in low self-advocacy.  
43  
44  
45  
46  
47  
48  
49

### 50 **Conclusion**

51 The use of professional interpreters had a positive impact on the overall satisfaction of LLP-  
52 caregivers with emergency care. LLP-caregivers were not well—positioned to advocate for  
53 language interpretation. Health care providers must be aware of their responsibility to  
54 guarantee good quality communication to ensure equitable quality of care and patient safety.  
55  
56  
57  
58  
59  
60

### ***Strengths and limitations of this study***

- The mixed methods approach allowed to measure the satisfaction with care of caregivers with LLP and also to explore underlying reasons.
- Root causes for unfrequent caregiver self-advocacy for professional language interpretation were detected.
- By systematically assessing and comparing comprehension of diagnosis and treatment to the self-reported comprehension of caregivers, important discrepancies were detected.
- Participation of professional interpreters and study participants in designing and analysing the data increased the validity of the study and accuracy of the findings.
- The study group where an interpreter was used was small, not allowing for further, inferential statistical testing.

1  
2  
3  
4  
5  
6  
7  
8  
9  
10  
11  
12  
13  
14  
15  
16  
17  
18  
19  
20  
21  
22  
23  
24  
25  
26  
27  
28  
29  
30  
31  
32  
33  
34  
35  
36  
37  
38  
39  
40  
41  
42  
43  
44  
45  
46  
47  
48  
49  
50  
51  
52  
53  
54  
55  
56  
57  
58  
59  
60

***Abbreviation***

LLP = Limited language proficiency

PED = Pediatric emergency department

For peer review only

## 1 **Introduction**

2 Language barriers and insufficient communication are major challenges in migrant health care  
3 delivery leading to decreased access and quality of care (1-7). In Switzerland, an estimated  
4 10% of the population face language barriers on a daily base as they either do not speak one of  
5 the four national languages or have another preferred language (8, 9). This proportion was  
6 further increased by the recent influx of Ukrainian refugees (10). Under the United Nations  
7 Convention on the Rights of the Child, Switzerland declares to provide every child with access  
8 to the highest attainable standard of health care (11). Successful communication, preferably  
9 with professional interpreters, is widely described as essential to minimize disparities in the  
10 quality of health care for these patients (1, 4, 8, 12-15). A Swiss legal report underscored that  
11 the right to receive language interpretation is part of any informed consent process in patients  
12 speaking other languages than the health providers (16). Yet, international evidence clearly  
13 shows that professional interpreters are underused in health care settings (1, 17-26).

14 A literature review including studies from the United States, Australia, the United Kingdom,  
15 Ireland, and Canada investigated the impact of language proficiency on the patient's  
16 experience in health care and found that impaired communication, relationship, discrimination,  
17 and cultural safety were main concerns. Factors improving the health care experience of  
18 patients with limited language proficiency (LLP) were mitigating language barriers through  
19 interpreters, offering translated patient resources improve transcultural competencies of health  
20 care professionals and enhance education for community resources for LLP caregivers (27,  
21 28). Other studies recommended systematic communication pathways for LLP patients (10)  
22 including improved guidelines on the use of interpreters, minimized barriers to access  
23 interpreter services, including sufficient financial coverage, and raised awareness about the  
24 importance of the use of interpreters among health workers (1, 17-19, 29-31). Improvements  
25 of the health care delivery to LLP patients were most successful if a participatory approach  
26 was chosen (32). Despite the considerable proportion of the population in Switzerland with  
27 LLP, evidence focusing on their perspective on the quality of health care related to  
28 communication is missing.

29 The goal of this study was to describe the satisfaction of LLP-caregivers related to the use of  
30 interpreters as a driver of quality of pediatric emergency care and to explore underlying,  
31 interacting factors influencing satisfaction.

## 1 **Methods**

### 2 **Study setting**

3 The study was conducted at the pediatric emergency department of the University Hospital of  
4 Bern, Switzerland. The department provides the full range of emergency care for children and  
5 adolescents aged 0-16 years to an average of over 30,000 patients per year. Since 2021 it is  
6 part of the “Swiss health network for equity”(33). An around-the-clock phone interpreter  
7 service is provided at the facility, and it is offered to patients free of charge, with the  
8 department covering the costs. For planned conversations (mostly on the wards or in  
9 outpatient clinics), in-person interpreters can be ordered on demand. The costs are covered by  
10 the hospital.

### 11 **Study design**

12 This study is a concurrent design mixed-method study (supplemental figure 1). As this study  
13 aimed to explore caregivers’ satisfaction related to the use of interpreters as part of health care  
14 management and delivery, it explored satisfaction in the context of a broad, complex, and  
15 multidimensional field. In such cases, a mixed-methods research design is known to offer  
16 multiple advantages (34), including the examination of the research question from multiple  
17 perspectives (35), the triangulation of two different methods and several forms of data (36-39)  
18 and the pragmatic flexibility of the methodology to adapt to the specific research question and  
19 context (40, 41). The most recent Equator network recommended standardized mixed-method  
20 research guidelines were used for the reporting of the study (supplemental table 1) (42).

21 The primary objective was to compare the LLP-caregivers’ satisfaction with health care with  
22 and without the use of professional interpreters. Secondary objectives were the analysis of  
23 self-reported versus assessed language proficiency, the comprehension of diagnosis and  
24 received therapy of their child, and their communication strategy and desire for professional  
25 interpreters.

26 This study was nested into an interventional study intended to increase the use of professional  
27 interpreter services (26). Consequently, data collection for this study was done during the  
28 predefined two time periods.

### 29 **Study population**

30 All patients visiting the emergency department between 1<sup>st</sup> April 2021 and 30<sup>th</sup> June 2021  
31 (first recruitment period) and between 1<sup>st</sup> October and 5<sup>th</sup> December 2021 (second recruitment  
32 period), were screened for the following inclusion criteria using the administrative records: i)

1  
2  
3 1 Nationality other than Swiss AND ii) Swiss nationality with national language other than  
4 2 German (G), French (F) or English (E) AND iii) not presenting only for a COVID-19 swab  
5 3 test.  
6  
7

8 4 All caregivers of patients who visited the emergency department and fulfilled the inclusion  
9 5 criteria were systematically called and screened for their language proficiency within one  
10 6 week after their consultation. If two caregivers were present at the consultation, the one with  
11 7 better language skills was screened. The ABC-Tool (43), a globally used standardized,  
12 8 multidimensional language proficiency screening tool, was adapted by the study team to the  
13 9 local context. Every caregiver who visited the PED and met the inclusion criteria was screened  
14 10 and their language proficiency classified, using the scoring system defined by the ‘Goethe  
15 11 Institute’, the most established international language school for German (44). The scoring  
16 12 ranges from A1 (very LLP) to C1 (fluent). All caregivers screened as A1 or A2 were classified  
17 13 as caregivers with LLP. If the screening was positive and caregivers agreed to receive a phone  
18 14 call, the LLP caregiver was contacted a few days later for a semi-structured phone interview  
19 15 with a professional interpreter. Prior to each interview, verbal informed consent was obtained  
20 16 from the LLP caregiver with the assistance of professional interpreters. The caregivers who  
21 17 completed the study interview represented the final study population.  
22  
23  
24  
25  
26  
27  
28  
29  
30  
31

### 32 33 18 **Data collection**

34 19 Following recommendations of Creswell and Zhang (45), quantitative and qualitative data  
35 20 were collected simultaneously. The quantitative data included electronic health records and  
36 21 quantitative measurements of the caregivers’ satisfaction. The qualitative data consisted of  
37 22 semi-structured interviews. Both datasets were analyzed in parallel and relationships between  
38 23 the condensed qualitative and quantitative results were visualized to obtain an in-depth  
39 24 understanding of caregivers’ satisfaction and its underlying factors. Quantitative and  
40 25 qualitative data collection, including phone call screenings and interviews, was conducted by  
41 26 author 1 and 3. During the study period they were employed as doctoral candidates at the  
42 27 pediatric emergency department of the University’s Hospital in Bern in the migrant health  
43 28 service research group. Both researchers had previous experience in pediatric migrant health  
44 29 research and were trained by author 2 and 8 in the conduction of diversity-sensitive, semi-  
45 30 structured interviews using presentations, role-play, and educational videos. Author 8 has  
46 31 extensive experience in qualitative research and pediatric migrant health.  
47  
48  
49  
50  
51  
52  
53  
54  
55  
56  
57  
58  
59  
60

## 1 **Qualitative data**

2 Two semi-structured interview guides were designed by the interprofessional study team using  
3 different versions for consultations with and without the use of professional interpreters  
4 (supplemental table 2). The questionnaire entailed closed (quantitative data) and open  
5 (qualitative data) questions.

6 The interview guides were discussed with and reviewed by a professional and experienced  
7 interpreter with migrant background. After external revision, pilot interviews were performed  
8 to assess comprehensibility, acceptability and interview-duration as to ensure that the  
9 information needed to answer the research questions was being produced. The preliminary  
10 interviews were discussed within the research team and analyzed in joint team sessions. The  
11 final interview guideline included mandatory core questions exploring reasons for the  
12 perceived quality of care with a focus on communication and the caregiver's confidence while  
13 communicating. Core questions were followed by non-mandatory prompts, allowing the  
14 interviewer to further explore interesting comments made by the caregiver.

15 All interviews were conducted with a professional phone interpreter who translated the  
16 caregiver's preferred language to German using iPhone SE/6's conference mode (Version iOS  
17 15.1/12.5.5).

18 Quotes from interviews of caregivers during health encounters using a professional interpreter  
19 were cited with A. Those without interpreter services were cited with B, followed by the  
20 interview number.

## 21 **Quantitative data**

22 For each participant, the following quantitative variables were extracted from routine  
23 administrative health records: nationality, age, gender, date of visit, diagnosis, therapy, and  
24 triage score. An Emergency Triage Scale (STS), ranging from 1: acute life-threatening to 5: non  
25 urgent, was used (46). Further variables were collected during the phone interview:  
26 satisfaction, accompanying person/s, native language, self-reported and estimated language  
27 skills in G/E/F, interpreter use, the child's diagnosis, therapy received, recency of immigration  
28 to Switzerland, caregiver's education, and resident status.

29 Caregiver were asked about their satisfaction with the health encounter ranging from 1 (very  
30 unsatisfied) to 6 (very satisfied). To describe the self-reported language comprehension,  
31 caregivers were asked if the information they received during the emergency department visit  
32 was understandable. The answers were classified as yes, partially, or no. To assess  
33 comprehension, the study team asked caregivers to explain the diagnosis and the treatments



1  
2  
3 1 the child received during the health visit. If the caregivers' answers corresponded to the  
4  
5 2 diagnosis and treatments recorded in the electronic medical report, they were marked as  
6  
7 3 match. Partial matches or discrepant answers were documented as partially correct or  
8  
9 4 incorrect.

### 10 5 **Data management and analysis**

11 6 All data were entered into a REDCap-database (Vanderbilt University/IC 6.9.4, 2018).

12 7 For quantitative data, entry fields were designed as binary radio button fields or scroll down  
13 8 lists. Branching logic was used where appropriate.

14 9 REDCap data quality control tests were performed before analysis. STATA (Stata/IC Version  
15 10 13.1. 2013) was used for statistical analysis.

16 11 Qualitative data was transcribed simultaneously to the phone interview and directly entered in  
17 12 the REDCap database. Three free-text fields summarized statements about the general patient  
18 13 satisfaction, two text fields documented caregivers' descriptions of his/her comprehension  
19 14 during the health visit, and one additional text field was used for further interesting statements.

20 15 For each of the 3 groups of free-text fields, answers from all participants were pooled together  
21 16 in one document and coded deductively and inductively by two coders (author 1 and 2) using  
22 17 the text analysis approach according to Mayring (47). Citations from LLP-caregivers in the  
23 18 interpreter group were compared to those from the non-interpreter group. Saturation was  
24 19 monitored continuously throughout recruitment and data collection and continued until new  
25 20 data mainly repeated information collected in previous interviews (48). Saturation of the  
26 21 material was reached in both groups.

27 22 During multiple online and in-person meetings, data was analyzed in a stepwise approach in  
28 23 an interprofessional team. The team included the authors of this study, a professional  
29 24 interpreter with migrant background, and one migrant caregiver. Through stepwise  
30 25 aggregation of the qualitative data, the resulting main categories were created. The  
31 26 relationships between the condensed qualitative and quantitative results were visualized in  
32 27 multiple networks, illustrating the final outcomes of this study.

### 33 28 **Ethics**

34 29 The Study protocol was reviewed (abbreviated process) and approved by the Ethics  
35 30 Committee of the canton Bern on 08 March 2021.

## 1 **Results**

### 2 **Study population**

3 A total of 181 caregivers were included in this study. Of those, 14 (7.7%) had a consultation  
4 with, and 167 (92.3%) a consultation without an interpreter (supplemental figure 2).

5 In consultations using an interpreter the most frequent nationalities were Eritrean 6/14  
6 (42.9%), Syrian 3/14 (21.4%) and Sri Lankan 2/14 (14.3%). A total of 57.1% (8/14) received  
7 an urgent triage score. Most caregivers graduated from primary school 6/14 (42.9%) followed  
8 by secondary school 5/14 (35.7%), while 2/14 (14.3%) were illiterate.

9 The most common nationalities in consultations without an interpreter were Syrian 37/167  
10 (22.2%), Eritrean 26/167 (15.6%), and Portuguese 13/167 (7.8%). A total of 25.1% (42/167)  
11 received an urgent triage score. The most frequent educational degree of these caregivers was  
12 secondary school 64/167 (38.3%), followed by primary school 56/167 (33.5%). 12.6%  
13 (21/167) were illiterate (table 1).

### 14 **Overall satisfaction**

15 The satisfaction was high in both groups with a total mean of 4.9 (Standard Deviation [SD]  
16  $\pm 1.6$ ). Caregivers in consultations with an interpreter were more satisfied than those in the  
17 non-interpreter group (5.5 [SD]  $\pm 1.4$  versus 4.8 [SD]  $\pm 1.6$ ; table 2). Satisfaction was  
18 influenced by 5 main factors: relationship with the health workers, patient management,  
19 alignment of health concepts, caregivers' personal expectation, and health outcome of the  
20 patient (figure 1). Satisfaction was optimal when the patient management met the caregiver's  
21 expectation, the relationship between health workers and caregivers was respectful and  
22 trustful, and when there was agreement on the same health concept (figure 2). Communication  
23 was the main tool able to modulate relationships, expectations, and health concepts  
24 influencing satisfaction through these factors.

### 25 **Satisfaction related to the use of interpreters**

26 In both groups, caregivers mentioned good communication as a key precondition for their  
27 satisfaction with the health encounter. In the group with an interpreter, all caregivers described  
28 the organization of interpreters as a sensible and helpful part of the patient management. The  
29 opinion on how often and when an interpreter was needed varied. Two caregivers thought an  
30 interpreter was only necessary for complex conversations.

1  
2  
3 1 “At the beginning I could communicate well, but when it became more complicated,  
4 2 the hospital organized an interpreter. That was great!” (A 8; Satisfaction score 6)

7 3 In the group without interpreter services, important language barriers were mentioned by  
8 4 53.7% (88/167) of the caregivers. Around 21% (35/167) explicitly described  
9 5 miscommunication and frustration during their visit. Some also thought of the health workers  
10 6 perspective and acknowledged that the situation was frustrating for them as well.

15 7 Despite not having language interpretation, 44.9% (75/167) were satisfied with the  
16 8 communication. Of all caregivers in the group without language interpretation, 100 (59.9%)  
17 9 had a higher self-reported language proficiency score than the score they received during the  
18 10 standardized language screening done by the researchers. Of those, 59% did not think a  
19 11 professional interpreter was necessary.

24 12 A total of 58/167 (34.7%) caregivers reported that they communicated through a non-  
25 13 professional interpreter. Of these, 43.1% (25/58) were minors with a mean age of 12.4 (11-14  
26 14 IQR). The youngest non-professional interpreter was 7 years old.

30 15 Some caregivers preferred professional interpreters for reasons of confidentiality whereas  
31 16 some favoured non-professional interpreters with the argument that they knew and trusted  
32 17 them or that they were more rapidly available than professional interpreters. One caregiver  
33 18 explained that they decided not to ask for language interpretation because they were worried  
34 19 about prolonged waiting times. As consequence, s/he guessed the answer to questions:

39 20 “I would have liked an interpreter, but I was afraid that the organization would take too  
40 21 long. Therefore, I did not say that I did not understand certain things and simply said  
41 22 ‘yes’. If I had known that there were also phone interpreters, I would have been very  
42 23 happy to use one.” (B 17; Satisfaction score 4)

47 24 A minority of 22.2% (37/167) of caregivers knew they were entitled to receive free of charge  
48 25 language interpretation during health consultations. A total of 61/167 (36.5%) caregivers  
49 26 explicitly said they would have asked for an interpreter had they known about that option.

53 27 As for the overall communication, satisfaction with comprehension differed between the two  
54 28 study groups. Caregivers with interpreters were more likely to describe comprehension as  
55 29 good (85.7% (12/14) versus 68.3% (114/167)). In contrast to caregivers without interpreter  
56 30 services, they never classified communication as insufficient. With one exception, all parents  
57 31 recalled the diagnosis and therapy of their children at least partially correctly whereas some

1  
2  
3 1 caregivers in the group without interpreters could not recall diagnosis (13.2% 22/167) or  
4 2 therapy (7.2% 12/167). In both groups, strong discrepancies existed between self-reported and  
5 3 assessed language comprehension (table 2).  
6  
7  
8

#### 9 4 **Expectation**

10 5 A key factor for satisfaction were the caregivers' personal expectations which were shaped by  
11 6 cultural background, health concepts, and previous experiences with health care systems  
12 7 (figure 1). Many caregivers were used to experiencing communication barriers in daily life.  
13 8 Using their children as interpreters was often considered normal routine. One mother reported  
14 9 that her 8-year-old child translated for her and admitted:  
15  
16  
17  
18

19  
20 10 "I did not understand what exactly was done during the operation."  
21  
22

23 11 (B 90; Satisfaction score 6)  
24

25 12 Nevertheless, she did not criticise that no interpreter was consulted for her and was highly  
26 13 satisfied. About 4.2% (7/167) of caregivers reported that they requested during this or previous  
27 14 health visits language interpretation at the emergency department, but their request was  
28 15 rejected.  
29  
30  
31

32 16 "I asked for an interpreter, but I was told it was too expensive and I couldn't get one.  
33 17 Then I called a friend, she translated for me. But it was about very intimate things and  
34 18 then everyone noticed. You can't do that!" (B 99; Satisfaction score 3)  
35  
36  
37

38 19 Expectations also influenced satisfaction with patient management. Depending on  
39 20 expectations, caregivers experienced wait times as long or short (long: 44.8% (81/181) short:  
40 21 15.5% (28/181)) without correlation to the objective wait time. The degree to which the wait  
41 22 time affected satisfaction also varied strongly. Some caregivers who expected to receive  
42 23 medical treatment very quickly had lower satisfaction scores. Others appreciated the 24 hours  
43 24 service and attended the emergency department after their working hours or on weekends,  
44 25 preferring to wait in the emergency department to waiting for an appointment with their  
45 26 pediatrician.  
46  
47  
48  
49  
50  
51

52 27 Unmet expectations negatively influenced the relationship with the health-workers. If  
53 28 mismatches in health workers' actions and caregivers' expectations remained unsolved,  
54 29 satisfaction decreased. Misunderstandings and miscommunication contributed to  
55 30 dissatisfaction as they impeded the ability of the staff to identify and respond to the caregivers'  
56  
57  
58  
59  
60

1  
2  
3 1 expectations. If gaps between health workers' actions and caregivers' expectations could not  
4  
5 2 be identified and bridged, it resulted in dissatisfaction.

7 3 "I am very dissatisfied. The doctor was not a real doctor. She only talked for 1 hour  
8  
9 4 and did not do a good examination nor a lab." (B 10; Satisfaction score 1)

### 5 **Health concepts**

13 6 Another key factor influencing satisfaction was the alignment of health workers' and  
14 7 caregivers' health concepts. The cultural background of the caregivers influenced the health  
15 8 concept and therefore the concept of the child's disease and the expectation what the child  
16 9 needed. Satisfaction decreased if there was an unresolved mismatch between the caregivers'  
17 10 and the health workers' health concepts. Most caregivers expected more diagnostics (blood  
18 11 work) and therapies (antibiotics, intravenous fluids). In two cases (assessed and reported  
19 12 comprehension: good in both cases), the caregivers' health concept was transformed during  
20 13 and after the health encounter. As the outcome for the child was favourable by the time of the  
21 14 interview, caregivers understood that the initially expected blood work in the emergency  
22 15 department had not been necessary. Good communication and comprehension, a trustful  
23 16 relationship, and a positive health outcome mediated the transformation of the caregivers'  
24 17 health concept leading to alignment with the health workers' practice. The only case in the  
25 18 interpreter group with very low satisfaction was due to a mismatch of health concepts that  
26 19 could not be resolved despite good communication assured by an interpreter.

38 20 "I was not satisfied with the consultation. The situation of my child was very serious,  
39 21 so I wished for an infusion. The nursing staff did not agree and did not do anything."  
40 22 (A 14; Satisfaction score 1)

### 44 23 **Relationship**

46 24 A trustful and respectful health worker–caregiver relationship also represented a key factor for  
47 25 satisfaction (figure 1 and 2). For some caregivers, friendly and respectful treatment gave the  
48 26 impression that the child's medical team was competent.

52 27 "The respect! I felt taken seriously and treated well." (A 2; Satisfaction score 6)

54 28 All statements describing the relationship with the staff were positive in the interpreter group.  
55 29 Once established, trustful relationships also helped to keep satisfaction high despite existing  
56 30 language barriers; like in the following example where the caregiver was satisfied with the  
57 31 whole health visit:

1  
2  
3 1 “The nursing staff and doctors are very nice and competent, they treated us with love.”

4  
5 2 (A 4; Satisfaction score 6)

6  
7 3 **Patient management**

8  
9 4 A fourth key factor influencing the caregiver’s satisfaction was the patient management. This  
10  
11 5 included waiting times, the triage system, organization of language interpretation, COVID-19  
12  
13 6 restrictions, and quality improvement.

14  
15 7 Many caregivers were not familiar with the triage system of prioritizing sicker patients. Seeing  
16  
17 8 children get treated earlier although they arrived later triggered the feeling of inequity and  
18  
19 9 injustice.

20  
21 10 “Not all patients were treated the same. I don’t know if it has to do with the language.  
22  
23 11 Other children got treated before us and we had to wait for so long. I felt  
24  
25 12 discriminated.” (B 117; Satisfaction score 2)

26  
27 13 Due to COVID-19 restrictions only one person was allowed to stay with the child during the  
28  
29 14 health visit. This was mentioned as a problem, as sometimes one caregiver knew more about  
30  
31 15 the child’s health condition but the other was more language-proficient. As one had to leave,  
32  
33 16 the ability to communicate was impaired:

34 17 “The father translated the medical history on the phone because he speaks German  
35  
36 18 well. After that, there were communication difficulties because I don’t speak German  
37  
38 19 very well. I did not understand a lot of what the doctor said.” (B 87; Satisfaction Score  
39  
40 20 4)

41  
42 21 Most of the caregivers were very satisfied with the patient management. They also appreciated  
43  
44 22 being contacted for the interview for quality improvement and receiving information about  
45  
46 23 interpreters being available anytime and free of charge.

47  
48 24 “All people who can’t speak German well have difficulties with communication at the  
49  
50 25 hospital and would like to have an interpreter. Thank you for your work and effort.”  
51  
52 26 (B 74; Satisfaction score 4)

## 1 *Discussion*

2 This study exploring the perception of the quality of pediatric emergency care among LLP-  
3 caregivers showed increased satisfaction of caregivers when professional language  
4 interpretation was used. The most frequently mentioned factors contributing to satisfaction,  
5 modulated by interpreter use were satisfied personal expectations, aligned health concepts, a  
6 respectful and trustful caregiver-health worker relationship, and good patient management.  
7 Caregivers were generally satisfied with their emergency department experience, but many  
8 had low expectations regarding communication quality. Overestimation of personal language  
9 skills was common and caregivers were often unaware of the option to get professional  
10 language interpretation.

11 The large difference in study population may be due to the fact that the telephone screening  
12 does not fully reflect the situation in the emergency department. However, the results are in  
13 line with current evidence, demonstrating that a very high number of caregivers with limited  
14 language proficiency does not receive language interpretation during health visits, resulting in  
15 inferior quality of care (1, 17, 19).

16 In our study, caregivers' satisfaction with health care was higher when professional  
17 interpreters were involved and understanding of diagnosis and treatment improved. This is  
18 well in line with strong evidence including 3 literature reviews, describing higher patient  
19 satisfaction, fewer interpretation mistakes, and increased quality of care when using  
20 professional interpreters during health visits for LLP-patients (4, 49, 50). While all the  
21 caregivers in the interpreter group described positive effects of professional language  
22 interpretation, a total of 44.9% of LLP-caregivers in the non-interpreter group were also  
23 satisfied with the communication. Findings showed a common overestimation of the personal  
24 language proficiency, low expectations regarding communication quality, and unawareness of  
25 the option to get professional language interpretation as explanations. This is in line with other  
26 studies describing that LLP-patients overestimated their language skills (51), rarely advocated  
27 for language interpretation, and were unaware of their own right to good quality  
28 communication (31). The finding of low caregivers' expectation related to communication is a  
29 concerning safety risk. If good communication is not ensured, caregivers are not allowed to  
30 play their role as important advocates for their child's health and safety. Being used to inferior  
31 standards to the extent that a person accepts the inferior treatment as normal is described in the  
32 literature as part of internalized discrimination (52). A Norwegian study exploring satisfaction  
33 among migrant women in an obstetric hospital setting showed that patients with lowest

1  
2  
3 1 language proficiency or education were less likely to express dissatisfaction compared to those  
4  
5 2 with better education or a Norwegian husband (53). As many were unaware of their right to  
6  
7 3 receive professional language interpretation, many caregivers' organized non-professional  
8  
9 4 interpreters - not uncommonly minors - to bridge the language gap. This practice is unsafe and  
10  
11 5 can have severe negative consequences for the patients (54-56). Different studies showed that  
12  
13 6 the use of minors as language brokers can lead to intra-familial problems, such as a shift of  
14  
15 7 power relations and a reversal of roles, or can be associated with negative emotions on the part  
16  
17 8 of the minors (57, 58). In the U.S, language interpretation provided by minors is also legally  
18  
19 9 prohibited by Section 1557 of the Affordable Care Act (59). These findings highlight that  
20  
21 10 organization of language interpretation should not be considered a shared responsibility  
22  
23 11 between caregivers and health workers but must be the full responsibility of health workers. A  
24  
25 12 most recent North American publication described a significant increase of the use of  
26  
27 13 professional language interpretation in a pediatric emergency department over a period of 5  
28  
29 14 years. The multidimensional strategy included staff education, data feedback, reduction of  
30  
31 15 barriers to interpreter use and improved identification of patient's language for care (60).  
32  
33 16 Similar long-term strategies may be needed in our research context to achieve comparable  
34  
35 17 results.

36  
37 18 One caregiver reported that his/her request to receive professional language interpretation was  
38  
39 19 rejected by health workers, arguing that these services would be too costly. Structural  
40  
41 20 discrimination of immigrant minorities including denial of services has also been described in  
42  
43 21 other studies (61). Improving personal skills and attitudes of staff to identify and counter-act  
44  
45 22 different forms of discrimination and to establish a diversity sensitive institutional culture is  
46  
47 23 therefore key when improving the quality of care for these patients (62-64).

48  
49 24 Other studies also described patients' expectations as key factor for patient satisfaction.  
50  
51 25 Expectations were shaped by many sociocultural factors and experiences from previous health  
52  
53 26 encounters (65, 66). In this study unmet expectations were mostly due to diverging health  
54  
55 27 concepts and misunderstandings about the patient management and or treatment.

56  
57 28 Divergent health concepts shaped by different cultural contexts e.g. about the perceived need  
58  
59 29 for antibiotics are well described and language barriers increased the difficulty to align these  
60  
30 as shown in different studies (67, 68). Like our findings, a qualitative study from the UK on  
31  
32 recent migrants' health beliefs, values and experiences of health care described the  
33  
34 transformation of health concepts or at least an agreement on common ground between



1  
2  
3 1 caregiver and health worker was achieved through effective communication, a trusting  
4 2 relationship, and a positive health outcome for the patient. High caregiver satisfaction was the  
5 3 consequence.  
6  
7

8  
9 4 All statements describing the relationship with the staff were positive in the interpreter group,  
10 5 suggesting that the organization of an interpreter and the improved ability to communicate  
11 6 contributed to a trustful relationship. Also in settings with no language barriers, a strong  
12 7 association between patient-centred communication, the patient-provider relationship, and  
13 8 patient satisfaction was found (66, 69, 70). A Swedish study showed that professional  
14 9 interpreters are associated with the improvement of relationship between the patient and  
15 10 caregivers, the increase of patient safety and patient involvement in care (71).

16 11 As also described in other studies, respect, friendliness and kindness led to trustful  
17 12 relationships and were described as important reasons for caregivers' satisfaction with care  
18 13 (72). Complaints about the relationship often derived from misconceptions and  
19 14 misunderstandings. Transcultural communication training enabling health workers to be  
20 15 culturally sensitive, reduce personal assumptions and professionally address and respond to  
21 16 differences in health concepts has proven to reduce misunderstandings and ultimately increase  
22 17 patient satisfaction (62). A Danish study was able to show the correlation of satisfaction with  
23 18 the reason of the emergency department visit, the more urgent the reason, the more satisfied  
24 19 the caregivers and staff (73). Clear communication while managing patients including  
25 20 explanations of the triage system and transparent communication of waiting times are known  
26 21 to increase the satisfaction of patients with LLP and those fluent in the local language alike  
27 22 (74).

### 23 **Strengths and limitations**

24 24 The greatest limitation of this study was the small number of included caregivers for whom an  
25 25 interpreter was used. Although saturation was reached for both groups in the qualitative  
26 26 material, the small number did not allow inferential statistical testing of the quantitative data.  
27 27 The language screening was conducted by phone, which might have led to a slightly different  
28 28 assessment of language proficiency compared to an in-person assessment during the PED visit.  
29 29 Although the language scoring system used in this study has been well established by Goethe  
30 30 institute, it is designed for the evaluation of day to day language and not specifically validated  
31 31 for the medical context. Although taking place in a health care context, this study did not  
32 32 evaluate health workers but caregivers, who are not required to know medical terms.  
33 33 Consequently, common language was dominantly used during conversations between

1  
2  
3 1 caregivers and health workers and therefore the use of the Goethe scoring system seemed  
4  
5 2 appropriate.

6  
7 3 An important strength of this study was the mixed method approach, allowing to measure the  
8  
9 4 satisfaction with care of LLP-caregivers and other secondary outcome parameters while also  
10  
11 5 allowing to explore underlying reasons for satisfaction. Through the qualitative data,  
12  
13 6 additional important findings were discovered like reasons for limited caregiver self-advocacy  
14  
15 7 for professional language interpretation. The validity of the study increased by the  
16  
17 8 interdisciplinarity of the team including professional interpreters and study participants in  
18  
19 9 designing and analysing the data.

## 20 21 11 ***Conclusion***

22  
23 12 The use of professional interpreters had a positive impact on the overall satisfaction of LLP-  
24  
25 13 caregivers with emergency care through modulating personal expectations, aligning health  
26  
27 14 concepts, and helping to create respectful and trustful caregiver-health worker relationships.  
28  
29 15 LLP-caregivers were not well-positioned to advocate for language interpretation. Health care  
30  
31 16 providers must be aware of their responsibility to guarantee good quality communication to  
32  
33 17 ensure equitable quality of care and patient safety.  
34  
35  
36  
37  
38  
39  
40  
41  
42  
43  
44  
45  
46  
47  
48  
49  
50  
51  
52  
53  
54  
55  
56  
57  
58  
59  
60

## 1 **Funding information**

2 The study was funded through the “Stiftung KinderInsel Bern” (formerly known as Batzebär  
3 foundation). JB received a research grant from the Edwin S.H. Leong Centre for Healthy  
4 Children, Toronto, Canada. Award/ Grant number is not applicable.

## 6 **Data availability**

7 All data relevant to the study are included in the article or uploaded as supplementary  
8 information. No additional data available.

## 10 **Conflict of interest**

11 The authors declare that they have no conflict of interest.

## 13 **Acknowledgements**

14 We thank all participating families for taking part in the study and providing feedback. We  
15 thank Angelika Louis, head of the interpreting service “Comprendi” and all the intercultural  
16 interpreters for interpreting during the interviews, Miss Bohlouli for providing feedback on  
17 our interview guideline, Mr Omar and Mr Al Faraj for discussing our results, Diego Lareida  
18 and Isabelle Schwerzmann for their help with data collection, Beatrice Lussi for her help in all  
19 the administrative tasks and Ante Wind for her linguistic support.

## 21 **Authors' contributions**

22 Myriam Gmünder: Conceived the study, conducted the interviews, performed data extraction,  
23 performed data analysis, drafted the initial manuscript, reviewed and revised the manuscript, and  
24 approved the final manuscript as submitted.

25 Noemi Gessler: Conceived the study, performed data analysis, drafted the initial manuscript,  
26 reviewed and revised the manuscript, and approved the final manuscript as submitted.

27 Sina Buser: Conceived the study, conducted the interviews, performed data extraction,  
28 reviewed and revised the manuscript and approved the final manuscript as submitted.

29 Ursula Feuz: Conceived the study, reviewed and revised the manuscript and approved the final  
30 manuscript as submitted.

31 Fayyaz Jabeen and Anne Jachmann: Reviewed and revised the manuscript and approved the  
32 final manuscript as submitted.

1  
2  
3  
4  
5  
6  
7  
8  
9  
10  
11  
12  
13  
14  
15  
16  
17  
18  
19  
20  
21  
22  
23  
24  
25  
26  
27  
28  
29  
30  
31  
32  
33  
34  
35  
36  
37  
38  
39  
40  
41  
42  
43  
44  
45  
46  
47  
48  
49  
50  
51  
52  
53  
54  
55  
56  
57  
58  
59  
60

1 Kristina Keitel: administrative project leader, conceived the study, supervised analysis,  
2 reviewed and revised the manuscript and approved the final manuscript as submitted.

3 Julia Brandenberger: scientific project leader, conceived the study, supervised analysis,  
4 reviewed and revised the manuscript and approved the final manuscript as submitted.

#### 6 ***Figures and Tables (4)***

7 **Figure 1:** Framework of factors influencing satisfaction

8 **Figure 2:** Framework prerequisite for a high satisfaction

For peer review only

1 **Table 1:** Baseline Characteristics

|                                               | With interpreter (14)     |                      |                  |                      | Without interpreter (167) |                      |                  |                      |
|-----------------------------------------------|---------------------------|----------------------|------------------|----------------------|---------------------------|----------------------|------------------|----------------------|
|                                               | N/ years                  |                      | %                |                      | N/ years                  |                      | %                |                      |
| <b>Most frequent nationalities</b>            | ER                        | 6                    | 42.9             |                      | SY                        | 37                   | 22.2             |                      |
|                                               | SY                        | 3                    | 21.4             |                      | ER                        | 26                   | 15.6             |                      |
|                                               | LK                        | 2                    | 14.3             |                      | PT                        | 13                   | 7.8              |                      |
|                                               | AF                        | 1                    | 7.1              |                      | AF                        | 11                   | 6.6              |                      |
|                                               | IQ                        | 1                    | 7.1              |                      | TR                        | 10                   | 6                |                      |
|                                               | SO                        | 1                    | 7.1              |                      | LK                        | 9                    | 5.4              |                      |
| <b>Most frequent languages</b>                | Tigrinya                  | 6                    | 42.9             |                      | Arabic                    | 38                   | 22.6             |                      |
|                                               | Arabic                    | 3                    | 21.4             |                      | Tigrinya                  | 25                   | 15               |                      |
|                                               | Tamil                     | 2                    | 14.3             |                      | Kurdish                   | 16                   | 9.5              |                      |
|                                               | Dari                      | 1                    | 7.1              |                      | Portuguese                | 14                   | 8.4              |                      |
|                                               | Kurmanji                  | 1                    | 7.1              |                      | Turkish                   | 13                   | 7.8              |                      |
|                                               | Somali                    | 1                    | 7.1              |                      | Albanish                  | 12                   | 7.2              |                      |
| <b>Language proficiency</b>                   | <u>estimated</u>          | <u>self-reported</u> | <u>estimated</u> | <u>self-reported</u> | <u>estimated</u>          | <u>self-reported</u> | <u>estimated</u> | <u>self-reported</u> |
| - A1                                          | 7                         | 5                    | 50               | 35.7                 | 66                        | 30                   | 39.5             | 18                   |
| - A2                                          | 7                         | 4                    | 50               | 28.6                 | 100                       | 35                   | 59.9             | 21                   |
| - B1                                          | 0                         | 5                    | 0                | 35.7                 | 1                         | 45                   | 0.6              | 26.9                 |
| - B2                                          |                           |                      |                  |                      |                           | 39                   |                  | 23.4                 |
| - C1                                          |                           |                      |                  |                      |                           | 12                   |                  | 7.2                  |
| - C2                                          |                           |                      |                  |                      |                           | 4                    |                  | 2.4                  |
| *missing                                      |                           |                      |                  |                      |                           | 2                    |                  | 1.2                  |
| <b>Duration of stay in CH</b><br>(min – max)  | 5.07 years<br>(20d – 12y) |                      |                  |                      | 6.71 years<br>(6d – 30y)  |                      |                  |                      |
| <b>Triage score:</b>                          |                           |                      |                  |                      |                           |                      |                  |                      |
| - 1-3: urgent                                 | 8                         |                      | 57.1             |                      | 42                        |                      | 25.1             |                      |
| - 4-5: non-urgent                             | 6                         |                      | 42.9             |                      | 124                       |                      | 74.3             |                      |
| *missing                                      | 0                         |                      |                  |                      | 1                         |                      | 0.6              |                      |
| <b>Highest education degree of caregiver:</b> |                           |                      |                  |                      |                           |                      |                  |                      |
| - Illiterate                                  | 2                         |                      | 14.3             |                      | 21                        |                      | 12.6             |                      |
| - Primary School                              | 6                         |                      | 42.9             |                      | 56                        |                      | 33.5             |                      |
| - Secondary School                            | 5                         |                      | 35.7             |                      | 64                        |                      | 38.3             |                      |
| - University                                  | 0                         |                      | 0                |                      | 26                        |                      | 15.6             |                      |
| <b>Asylum permission/Residence status:</b>    |                           |                      |                  |                      |                           |                      |                  |                      |
| - N-Permit                                    | 0                         |                      | 0                |                      | 3                         |                      | 1.8              |                      |
| - F-Permit                                    | 5                         |                      | 35.7             |                      | 33                        |                      | 19.8             |                      |
| - B-permit                                    | 6                         |                      | 42.9             |                      | 93                        |                      | 55.7             |                      |
| - C-permit                                    | 1                         |                      | 7.1              |                      | 25                        |                      | 15               |                      |
| - not known                                   | 1                         |                      | 7.1              |                      | 9                         |                      | 5.4              |                      |

2 y = year, d = day, N-permit = asylum-seeker, F-permit = temporarily admitted refugee, B-permit = temporary resident foreign nationals, C-permit = settlement permit

1 **Table 2: Quantitative Data**

|                                                 |                                       | With interpreter (14) |       | Without interpreter (167) |       |      |
|-------------------------------------------------|---------------------------------------|-----------------------|-------|---------------------------|-------|------|
|                                                 |                                       | N/ mean               | %/ SD | N/ mean                   | %/ SD |      |
| <b>General satisfaction<sup>o</sup></b>         | Mean/ SD                              | 5.46                  | 1.39  | 4.8                       | 1.59  |      |
|                                                 | 1                                     | 1                     | 7.1   | 11                        | 6.6   |      |
|                                                 | 2                                     | 0                     | 0     | 11                        | 6.6   |      |
|                                                 | 3                                     | 0                     | 0     | 12                        | 7.2   |      |
|                                                 | 4                                     | 0                     | 0     | 16                        | 9.6   |      |
|                                                 | 5                                     | 2                     | 14.3  | 31                        | 18.6  |      |
|                                                 | 6                                     | 10                    | 71.4  | 84                        | 50.3  |      |
|                                                 | *missing                              | 1                     | 7.1   | 2                         | 1.2   |      |
| <b>Communication</b>                            |                                       |                       |       |                           |       |      |
| <b>Language barrier</b>                         | yes                                   | NA                    | NA    | 88                        | 52.7  |      |
|                                                 | - A1                                  | NA                    | NA    | 43                        | 48.9  |      |
|                                                 | - A2                                  |                       |       | 45                        | 51.1  |      |
|                                                 | no                                    | NA                    | NA    | 75                        | 44.9  |      |
|                                                 | - A1                                  | NA                    | NA    | 18                        | 24    |      |
|                                                 | - A2                                  |                       |       | 54                        | 72    |      |
|                                                 | - B1                                  |                       |       | 1                         | 1.3   |      |
|                                                 | *missing                              | NA                    | NA    | 4                         | 2.4   |      |
| <b>Non-professional Interpreter</b>             | yes                                   | NA                    | NA    | 58                        | 34.7  |      |
|                                                 | - siblings                            | NA                    | NA    | 8                         | 13.8  |      |
|                                                 | - family member                       |                       |       | 10                        | 17.2  |      |
|                                                 | - friend                              |                       |       | 17                        | 29.3  |      |
|                                                 | - hospital staff                      |                       |       | 5                         | 8.6   |      |
|                                                 | - patient                             |                       |       | 17                        | 29.3  |      |
|                                                 | - other                               |                       |       | 1                         | 1.7   |      |
|                                                 | Of which minors                       | NA                    | NA    | 25                        | 43.1  |      |
|                                                 | no                                    | NA                    | NA    | 105                       | 62.9  |      |
|                                                 | *missing                              | NA                    | NA    | 4                         | 2.4   |      |
| <b>Self-reported and assessed comprehension</b> |                                       |                       |       |                           |       |      |
| <b>Understandable Information</b>               | Self-reported comprehension = good    |                       | 12    | 85.7                      | 114   | 68.3 |
|                                                 | <b>Correct Diagnosis</b>              | yes                   | 4     | 33.3                      | 49    | 43   |
|                                                 |                                       | partial               | 8     | 66.7                      | 45    | 39.5 |
|                                                 |                                       | insufficient          | 0     | 0                         | 18    | 15.8 |
|                                                 |                                       | *missing              |       |                           | 2     | 1.8  |
|                                                 | <b>Correct Therapy</b>                | yes                   | 5     | 41.7                      | 47    | 41.2 |
|                                                 |                                       | partial               | 6     | 50                        | 55    | 48.3 |
|                                                 |                                       | insufficient          | 1     | 8.3                       | 8     | 7    |
|                                                 |                                       | *missing              |       |                           | 4     | 3.5  |
|                                                 | Self-reported comprehension = partial |                       | 2     | 14.3                      | 36    | 21.6 |
|                                                 | <b>Correct Diagnosis</b>              | yes                   | 2     | 100                       | 15    | 41.7 |
|                                                 |                                       | partial               | 0     | 0                         | 17    | 47.2 |
|                                                 |                                       | no                    | 0     | 0                         | 3     | 8.3  |
|                                                 |                                       | *missing              |       |                           | 1     | 2.8  |
|                                                 | <b>Correct Therapy</b>                | yes                   | 0     | 0                         | 16    | 44.4 |
|                                                 |                                       | partial               | 2     | 100                       | 15    | 41.7 |
| insufficient                                    |                                       | 0                     | 0     | 4                         | 11.1  |      |
| *missing                                        |                                       |                       |       | 1                         | 2.8   |      |
| Self-reported comprehension = insufficient      |                                       | 0                     | 0     | 11                        | 6.6   |      |
| <b>Correct Diagnosis</b>                        | yes                                   | 0                     | 0     | 4                         | 36.4  |      |
|                                                 | partial                               | 0                     | 0     | 6                         | 54.5  |      |
|                                                 | insufficient                          | 0                     | 0     | 1                         | 9.1   |      |
| <b>Correct Therapy</b>                          | yes                                   | 0                     | 0     | 4                         | 36.4  |      |
|                                                 | partial                               | 0                     | 0     | 7                         | 63.6  |      |
|                                                 | insufficient                          | 0                     | 0     | 0                         | 0     |      |
|                                                 | *missing                              | 0                     | 0     | 6                         | 3.6   |      |

| Interpreter use                         |          |    |      |     |      |
|-----------------------------------------|----------|----|------|-----|------|
| Interpreter – sensible and helpful?     | yes      | 14 | 100  | NA  | NA   |
| Interpreter desired                     | yes      | NA | NA   | 89  | 53.3 |
|                                         | no       | NA | NA   | 74  | 44.3 |
|                                         | *missing | NA | NA   | 4   | 2.4  |
| Knowledge about interpreter entitlement | yes      | 7  | 50   | 37  | 22.2 |
|                                         | no       | 6  | 42.9 | 125 | 74.9 |
|                                         | *missing | 1  | 7.1  | 5   | 3    |

°General Satisfaction: 1= not satisfied, 6= very satisfied  
 NA = not applicable

For peer review only

1  
2  
3  
4  
5  
6  
7  
8  
9  
10  
11  
12  
13  
14  
15  
16  
17  
18  
19  
20  
21  
22  
23  
24  
25  
26  
27  
28  
29  
30  
31  
32  
33  
34  
35  
36  
37  
38  
39  
40  
41  
42  
43  
44  
45  
46  
47  
48  
49  
50  
51  
52  
53  
54  
55  
56  
57  
58  
59  
60

1 ***Supplementary data (4)***

2 **Supplemental figure 1:** concurrent mixed-method approach (modified from Banyard &  
3 Williams, 2007)(75).

4 **Supplemental figure 2:** Flow chart - Study population

6 **Supplemental table 1:** Checklist for MMR Manuscript preparation and review

7 **Supplemental table 2:** Interview guide

For peer review only



## 1 **References**

- 2 1. Ramirez D, Engel KG, Tang TS. Language interpreter utilization in the emergency  
3 department setting: a clinical review. *J Health Care Poor Underserved*. 2008;19(2):352-62.
- 4 2. Cohen AL, Rivara F, Marcuse EK, McPhillips H, Davis R. Are language barriers  
5 associated with serious medical events in hospitalized pediatric patients? *Pediatrics*.  
6 2005;116(3):575-9.
- 7 3. Lion KC, Rafton SA, Shafii J, Brownstein D, Michel E, Tolman M, et al. Association  
8 between language, serious adverse events, and length of stay among hospitalized children.  
9 *Hosp Pediatr*. 2013;3(3):219-25.
- 10 4. Flores G. The impact of medical interpreter services on the quality of health care: a  
11 systematic review. *Med Care Res Rev*. 2005;62(3):255-99.
- 12 5. Brandenberger J, Tylleskär T, Sontag K, Peterhans B, Ritz N. A systematic literature  
13 review of reported challenges in health care delivery to migrants and refugees in high-income  
14 countries - the 3C model. *BMC Public Health*. 2019;19(1):755.
- 15 6. Organization GWH. Refugee and migrant health: global competency standards for  
16 health workers. 2021.
- 17 7. Stewart MA. Effective physician-patient communication and health outcomes: a  
18 review. *Cmaj*. 1995;152(9):1423-33.
- 19 8. Agathe Blaser KG, Thomas Spang. National Programme on Migration and Health.  
20 Federal Office of Public Health; 2013.
- 21 9. (FOPH) FOoPH. Community interpreting [June 2023]. Available from:  
22 [https://www.bag.admin.ch/bag/en/home/strategie-und-politik/nationale-  
23 gesundheitsstrategien/gesundheitsliche-chancengleichheit/interkulturelles-dolmetschen.html](https://www.bag.admin.ch/bag/en/home/strategie-und-politik/nationale-gesundheitsstrategien/gesundheitsliche-chancengleichheit/interkulturelles-dolmetschen.html).
- 24 10. Nijman RG, Bressan S, Brandenberger J, Kaur D, Keitel K, Maconochie IK, et al.  
25 Update on the Coordinated Efforts of Looking After the Health Care Needs of Children and  
26 Young People Fleeing the Conflict Zone of Ukraine Presenting to European Emergency  
27 Departments-A Joint Statement of the European Society for Emergency Paediatrics and the  
28 European Academy of Paediatrics. *Front Pediatr*. 2022;10:897803.
- 29 11. United Nations HR. Convention on the Rights of the Child [October 2023]. Available  
30 from: <https://www.ohchr.org/en/instruments-mechanisms/instruments/convention-rights-child>.
- 31 12. Gutman CK, Cousins L, Gritton J, Klein EJ, Brown JC, Scannell J, et al. Professional  
32 Interpreter Use and Discharge Communication in the Pediatric Emergency Department. *Acad  
33 Pediatr*. 2018;18(8):935-43.
- 34 13. Karliner LS, Pérez-Stable EJ, Gregorich SE. Convenient Access to Professional  
35 Interpreters in the Hospital Decreases Readmission Rates and Estimated Hospital  
36 Expenditures for Patients With Limited English Proficiency. *Med Care*. 2017;55(3):199-206.
- 37 14. Flores G, Abreu M, Barone CP, Bachur R, Lin H. Errors of Medical Interpretation and  
38 Their Potential Clinical Consequences: A Comparison of Professional Versus Ad Hoc Versus  
39 No Interpreters. *Annals of Emergency Medicine*. 2012;60(5):545-53.
- 40 15. Ellahham S. Communication in Health Care: Impact of Language and Accent on  
41 Health Care Safety, Quality, and Patient Experience. *American Journal of Medical Quality*.  
42 2021;36(5):355-64.
- 43 16. Achermann A. KJ. Übersetzen im Gesundheitsbereich: Ansprüche und Kostentragung.  
44 2008.
- 45 17. Blay N, Ioannou S, Seremetkoska M, Morris J, Holters G, Thomas V, et al. Healthcare  
46 interpreter utilisation: analysis of health administrative data. *BMC Health Serv Res*.  
47 2018;18(1):348.

- 1  
2  
3 1 18. Jones L, Sheeran N, Pines R, Saunders B. How do health professionals decide whether  
4 2 an interpreter is needed for families in neonatal and pediatric units? *Patient Educ Couns*.  
5 3 2019;102(9):1629-35.  
6 4 19. Seers K, Cook L, Abel G, Schluter P, Bridgford P. Is it time to talk? Interpreter  
7 5 services use in general practice within Canterbury. *J Prim Health Care*. 2013;5(2):129-37.  
8 6 20. Gutman CK, Klein EJ, Follmer K, Brown JC, Ebel BE, Lion KC. Deficiencies in  
9 7 Provider-Reported Interpreter Use in a Clinical Trial Comparing Telephonic and Video  
10 8 Interpretation in a Pediatric Emergency Department. *The Joint Commission Journal on Quality  
11 9 and Patient Safety*. 2020;46(10):573-80.  
12 10 21. Lundin C, Hadziabdic E, Hjelm K. Language interpretation conditions and boundaries  
13 11 in multilingual and multicultural emergency healthcare. *BMC International Health and Human  
14 12 Rights*. 2018;18(1):23.  
15 13 22. Lion KC, Gritton J, Scannell J, Brown JC, Ebel BE, Klein EJ, et al. Patterns and  
16 14 Predictors of Professional Interpreter Use in the Pediatric Emergency Department. *Pediatrics*.  
17 15 2021;147(2).  
18 16 23. Phillips CB, Travaglia J. Low levels of uptake of free interpreters by Australian doctors  
19 17 in private practice: secondary analysis of national data. *Aust Health Rev*. 2011;35(4):475-9.  
20 18 24. Schlange SA, Palmer-Wackerly AL, Chaidez V. A Narrative Review of Medical  
21 19 Interpretation Services and their Effect on the Quality of Health Care. *South Med J*.  
22 20 2022;115(5):317-21.  
23 21 25. Lion KC, Ebel BE, Rafton S, Zhou C, Hencz P, Mangione-Smith R. Evaluation of a  
24 22 quality improvement intervention to increase use of telephonic interpretation. *Pediatrics*.  
25 23 2015;135(3):e709-16.  
26 24 26. Sina B, Noemi G, Myriam G, Ursula F, Anne J, Jabeen F, et al. The use of intercultural  
27 25 interpreter services at a pediatric emergency department in Switzerland. *BMC Health Serv  
28 26 Res*. 2022;22(1):1365.  
29 27 27. Yehekel A, Rawal S. Exploring the 'Patient Experience' of Individuals with Limited  
30 28 English Proficiency: A Scoping Review. *J Immigr Minor Health*. 2019;21(4):853-78.  
31 29 28. Zamor RL, Vaughn LM, McCann E, Sanchez L, Page EM, Mahabee-Gittens EM.  
32 30 Perceptions and experiences of Latinx parents with language barriers in a pediatric emergency  
33 31 department: a qualitative study. *BMC Health Serv Res*. 2022;22(1):1463.  
34 32 29. Lundin C, Hadziabdic E, Hjelm K. Language interpretation conditions and boundaries  
35 33 in multilingual and multicultural emergency healthcare. *BMC Int Health Hum Rights*.  
36 34 2018;18(1):23.  
37 35 30. Jaeger FN, Pellaud N, Laville B, Klauser P. Barriers to and solutions for addressing  
38 36 insufficient professional interpreter use in primary healthcare. *BMC Health Serv Res*.  
39 37 2019;19(1):753.  
40 38 31. Pérez-Stable EJ, El-Toukhy S. Communicating with diverse patients: How patient and  
41 39 clinician factors affect disparities. *Patient Educ Couns*. 2018;101(12):2186-94.  
42 40 32. Steinberg EM, Valenzuela-Araujo D, Zickafoose JS, Kieffer E, DeCamp LR. The  
43 41 "Battle" of Managing Language Barriers in Health Care. *Clin Pediatr (Phila)*.  
44 42 2016;55(14):1318-27.  
45 43 33. Swiss Health Network for Equity [October 2023]. Available from: [https://health-  
46 44 equity-network.ch/](https://health-equity-network.ch/).  
47 45 34. Fetters MD, Curry LA, Creswell JW. Achieving integration in mixed methods designs-  
48 46 principles and practices. *Health Serv Res*. 2013;48(6 Pt 2):2134-56.  
49 47 35. Dowding D. Best Practices for Mixed Methods Research in the Health Sciences John  
50 48 W. Creswell, Ann Carroll Klassen, Vicki L. Plano Clark, Katherine Clegg Smith for the Office  
51 49 of Behavioral and Social Sciences Research; Qualitative Methods Overview Jo Moriarty.  
52 50 *Qualitative Social Work*. 2013;12(4):541-5.

- 1  
2  
3 1 36. Castro FG, Kellison JG, Boyd SJ, Kopak A. A Methodology for Conducting  
4 2 Integrative Mixed Methods Research and Data Analyses. *Journal of Mixed Methods Research*.  
5 3 2010;4(4):342-60.  
6 4 37. Hadi MA, Alldred DP, Closs SJ, Briggs M. Mixed-methods research in pharmacy  
8 5 practice: basics and beyond (part 1). *International Journal of Pharmacy Practice*.  
9 6 2012;21(5):341-5.  
10 7 38. Hussein A. The use of Triangulation in Social Sciences Research: Can qualitative and  
11 8 quantitative methods be combined? *Journal of Comparative Social Work*. 2009;4(1):106 - 17.  
12 9 39. Thurmond VA. The point of triangulation. *J Nurs Scholarsh*. 2001;33(3):253-8.  
13 10 40. Creswell JW, Clark VLP. *Designing and conducting mixed methods research*: Sage  
14 11 publications; 2017.  
15 12 41. Ridde V, Olivier de Sardan J-P. A mixed methods contribution to the study of health  
16 13 public policies: complementarities and difficulties. *BMC Health Services Research*.  
17 14 2015;15(3):1-8.  
18 15 42. Lee SD, Iott B, Banaszak-Holl J, Shih SF, Raj M, Johnson KE, et al. Application of  
20 16 Mixed Methods in Health Services Management Research: A Systematic Review. *Med Care*  
21 17 *Res Rev*. 2022;79(3):331-44.  
22 18 43. WSLHD. Assessing the need for an interpreter [June 2023]. Available from:  
24 19 [https://www.wslhd.health.nsw.gov.au/Health-Care-Interpreter-Service-/Assessing-the-need-](https://www.wslhd.health.nsw.gov.au/Health-Care-Interpreter-Service-/Assessing-the-need-for-an-Interpreter)  
25 20 [for-an-Interpreter](https://www.wslhd.health.nsw.gov.au/Health-Care-Interpreter-Service-/Assessing-the-need-for-an-Interpreter).  
26 21 44. Goethe-Institut 2023: Course Levels - German courses and German exams [June  
27 22 2023]. Available from: <https://www.goethe.de/en/spr/kup/kon/stu.html>.  
28 23 45. Creswell JW, Zhang W. The application of mixed methods designs to trauma research.  
29 24 *J Trauma Stress*. 2009;22(6):612-21.  
30 25 46. RUTSCHMANN O-T, SIEBER R-S, HUGLI O-W. Recommandations de la Société  
32 26 suisse de médecine d'urgence et de sauvetage pour le triage dans les services d'urgences  
33 27 hospitaliers en Suisse. *Bulletin des médecins suisses*. 2009;90(46):1789-90.  
34 28 47. Mayring P. *Qualitative content analysis - theoretical foundation, basic procedures and*  
35 29 *software solution* 2014.  
36 30 48. Saunders B, Sim J, Kingstone T, Baker S, Waterfield J, Bartlam B, et al. Saturation in  
38 31 qualitative research: exploring its conceptualization and operationalization. *Qual Quant*.  
39 32 2018;52(4):1893-907.  
40 33 49. Al Shamsi H, Almutairi AG, Al Mashrafi S, Al Kalbani T. Implications of Language  
41 34 Barriers for Healthcare: A Systematic Review. *Oman Med J*. 2020;35(2):e122.  
42 35 50. Karliner LS, Jacobs EA, Chen AH, Mutha S. Do professional interpreters improve  
43 36 clinical care for patients with limited English proficiency? A systematic review of the  
44 37 literature. *Health Serv Res*. 2007;42(2):727-54.  
45 38 51. Okraïnec K, Miller M, Holcroft C, Boivin JF, Greenaway C. Assessing the need for a  
47 39 medical interpreter: are all questions created equal? *J Immigr Minor Health*. 2014;16(4):756-  
48 40 60.  
49 41 52. Jones CP. Levels of racism: a theoretic framework and a gardener's tale. *Am J Public*  
50 42 *Health*. 2000;90(8):1212-5.  
51 43 53. Bains S, Sundby J, Lindskog BV, Vangen S, Diep LM, Owe KM, et al. Satisfaction  
53 44 with maternity care among recent migrants: an interview questionnaire-based study. *BMJ*  
54 45 *Open*. 2021;11(7):e048077.  
55 46 54. Bischoff A, Loutan L. Interpreting in Swiss hospitals. *Interpreting*. 2004;6:181-204.  
56 47 55. Cohen SL, Moran-Ellis J, Smaje C. Children as informal interpreters in GP  
57 48 consultations: pragmatics and ideology. *Sociology of Health and Illness*. 1999;21:163-86.  
58 49 56. Meyer B, Pawlack B, Kliche O, editors. *Family interpreters in hospitals : Good reasons*  
59 50 *for bad practice ?* 2010.

- 1  
2  
3 1 57. Banas JR, Ball JW, Wallis LC, Gershon S. The Adolescent Health Care Broker-  
4 2 Adolescents Interpreting for Family Members and Themselves in Health Care. *J Community*  
5 3 *Health*. 2017;42(4):739-47.  
6 4 58. Orellana MF, Dorner L, Pulido L. Accessing Assets: Immigrant Youth's Work as  
7 5 Family Translators or "Para-Phrasers". *Social Problems*. 2014;50(4):505-24.  
8 6 59. Secretary UDoCOo. Federal Register.  
9 7 60. Hartford EA, Rutman LE, Fenstermacher S, Eaton K, Ramos J, Carlin K, et al.  
10 8 Improving and Sustaining Interpreter Use Over 5 Years in a Pediatric Emergency Department.  
11 9 *Pediatrics*. 2023.  
12 10 61. Pollock G, Newbold B, editors. PERCEPTIONS OF DISCRIMINATION IN  
13 11 HEALTH SERVICES EXPERIENCED BY IMMIGRANT MINORITIES IN  
14 12 ONTARIO2015.  
15 13 62. Taylor C, Bengner JR. Patient satisfaction in emergency medicine. *Emerg Med J*.  
16 14 2004;21(5):528-32.  
17 15 63. Boudreaux ED, O'Hea EL. Patient satisfaction in the Emergency Department: a review  
18 16 of the literature and implications for practice. *J Emerg Med*. 2004;26(1):13-26.  
19 17 64. Batbaatar E, Dorjdagva J, Luvsannyam A, Savino MM, Amenta P. Determinants of  
20 18 patient satisfaction: a systematic review. *Perspect Public Health*. 2017;137(2):89-101.  
21 19 65. Lakin K, Kane S. Peoples' expectations of healthcare: A conceptual review and  
22 20 proposed analytical framework. *Social Science & Medicine*. 2022;292:114636.  
23 21 66. Larson E, Sharma J, Bohren MA, Tunçalp Ö. When the patient is the expert: measuring  
24 22 patient experience and satisfaction with care. *Bull World Health Organ*. 2019;97(8):563-9.  
25 23 67. Özcebe H, Üner S, Karadag O, Daryani A, Gershuni O, Czabanowska K, et al.  
26 24 Perspectives of physicians and pharmacists on rational use of antibiotics in Turkey and among  
27 25 Turkish migrants in Germany, Sweden and the Netherlands: a qualitative study. *BMC Prim*  
28 26 *Care*. 2022;23(1):29.  
29 27 68. Herrero-Arias R, Diaz E. A qualitative study on the experiences of southern European  
30 28 immigrant parents navigating the Norwegian healthcare system. *Int J Equity Health*.  
31 29 2021;20(1):42.  
32 30 69. Boissy A, Windover AK, Bokar D, Karafa M, Neuendorf K, Frankel RM, et al.  
33 31 Communication Skills Training for Physicians Improves Patient Satisfaction. *J Gen Intern*  
34 32 *Med*. 2016;31(7):755-61.  
35 33 70. Drossman DA, Chang L, Deutsch JK, Ford AC, Halpert A, Kroenke K, et al. A Review  
36 34 of the Evidence and Recommendations on Communication Skills and the Patient-Provider  
37 35 Relationship: A Rome Foundation Working Team Report. *Gastroenterology*.  
38 36 2021;161(5):1670-88.e7.  
39 37 71. Granhagen Jungner J, Tiselius E, Blomgren K, Lützn K, Pergert P. Language barriers  
40 38 and the use of professional interpreters: a national multisite cross-sectional survey in pediatric  
41 39 oncology care. *Acta Oncol*. 2019;58(7):1015-20.  
42 40 72. Brandenberger J, Sontag K, Duchêne-Lacroix C, Jaeger FN, Peterhans B, Ritz N.  
43 41 Perspective of asylum-seeking caregivers on the quality of care provided by a Swiss paediatric  
44 42 hospital: a qualitative study. *BMJ Open*. 2019;9(9):e029385.  
45 43 73. Mygind A, Norredam M, Nielsen AS, Bagger J, Krasnik A. The effect of patient origin  
46 44 and relevance of contact on patient and caregiver satisfaction in the emergency room. *Scand J*  
47 45 *Public Health*. 2008;36(1):76-83.  
48 46 74. Lee S, Groß SE, Pfaff H, Dresen A. Waiting time, communication quality, and patient  
49 47 satisfaction: An analysis of moderating influences on the relationship between perceived  
50 48 waiting time and the satisfaction of breast cancer patients during their inpatient stay. *Patient*  
51 49 *Education and Counseling*. 2020;103(4):819-25.  
52  
53  
54  
55  
56  
57  
58  
59  
60

1  
2  
3 1 75. Banyard VL, Williams LM. Women's voices on recovery: A multi-method study of the  
4 2 complexity of recovery from child sexual abuse. *Child Abuse & Neglect*. 2007;31(3):275-90.  
5 3  
6  
7  
8  
9  
10  
11  
12  
13  
14  
15  
16  
17  
18  
19  
20  
21  
22  
23  
24  
25  
26  
27  
28  
29  
30  
31  
32  
33  
34  
35  
36  
37  
38  
39  
40  
41  
42  
43  
44  
45  
46  
47  
48  
49  
50  
51  
52  
53  
54  
55  
56  
57  
58  
59  
60

For peer review only

1  
2  
3  
4  
5  
6  
7  
8  
9  
10  
11  
12  
13  
14  
15  
16  
17  
18  
19  
20  
21  
22  
23  
24  
25  
26  
27  
28  
29  
30  
31  
32  
33  
34  
35  
36  
37  
38  
39  
40  
41  
42  
43  
44  
45  
46  
47  
48  
49  
50  
51  
52  
53  
54  
55  
56  
57  
58  
59  
60

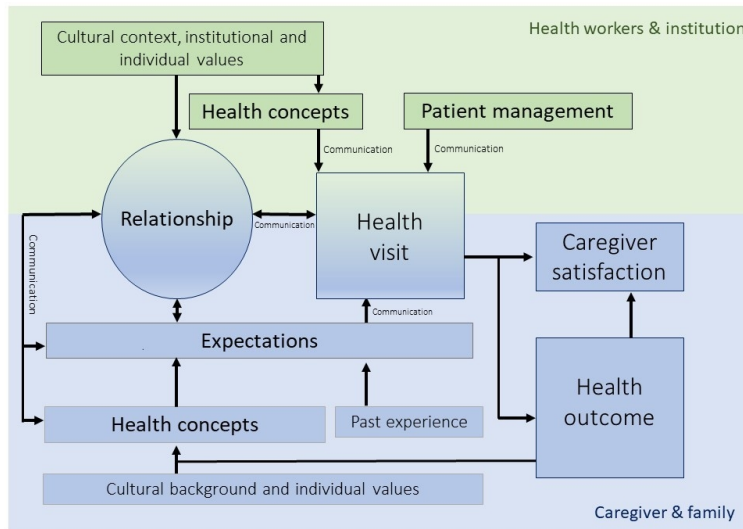

Framework of factors influencing satisfaction

338x190mm (96 x 96 DPI)

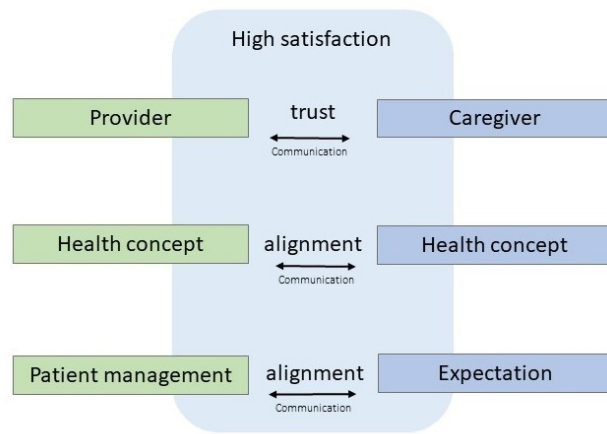

Framework prerequisite for a high satisfaction

268x166mm (96 x 96 DPI)

**Supplemental table 1: Checklist for MMR Manuscript preparation and review**

|                                                                 |                                                                                                                                                                                                                                                                                                                                                                                                                                                                                                                                                                                                                                                                                                                                                                                                                                                                                                                            |
|-----------------------------------------------------------------|----------------------------------------------------------------------------------------------------------------------------------------------------------------------------------------------------------------------------------------------------------------------------------------------------------------------------------------------------------------------------------------------------------------------------------------------------------------------------------------------------------------------------------------------------------------------------------------------------------------------------------------------------------------------------------------------------------------------------------------------------------------------------------------------------------------------------------------------------------------------------------------------------------------------------|
| Rational and description of MMR design                          | <ul style="list-style-type: none"> <li>□ Provide a clear statement of the study purpose</li> <li>□ Explicitly describe the MMR design in accordance with <a href="#">Creswell's (2015)</a> typology and use a diagram to illustrate the relationship and sequence of qualitative and quantitative research components</li> <li>□ Justify why the MMR design is appropriate for meeting the study purpose</li> </ul>                                                                                                                                                                                                                                                                                                                                                                                                                                                                                                        |
| Transparency in describing method details                       | <ul style="list-style-type: none"> <li>□ Describe the study population(s) and sample(s; e.g., who, what, how many)</li> <li>□ Describe the sampling procedures (including inclusion and exclusion criteria, recruitment)</li> <li>□ Describe qualitative data collection processes (how often data were collected, who collected the data, what kind of data collection instruments were used, how data were recorded—e.g., notes, transcripts)</li> <li>□ Describe quantitative data collection processes (how often data were collected, who collected the data, what kind of data collection instruments were used measurements, validity/reliability)</li> <li>□ Describe qualitative data analysis processes (coding, single or multiple coders, replication logic, credibility)</li> <li>□ Describe quantitative data analysis procedures (missing data and how they are handled, statistical tests used)</li> </ul> |
| Integration of qualitative and quantitative research components | <ul style="list-style-type: none"> <li>□ Interpret qualitative analysis results with appropriate quotes if necessary</li> <li>□ Interpret quantitative analysis results in consideration of statistical significance, selection bias, and threats to validity</li> <li>□ Compare qualitative and quantitative results</li> <li>□ Address divergencies and inconsistencies between qualitative and quantitative results</li> </ul>                                                                                                                                                                                                                                                                                                                                                                                                                                                                                          |



## Supplemental table 2: Interview guide

|                                          |                                                                                                                                                                                                                                                                                                                                                                      |                                                                                                                                                                                                                                                                                                                                                                                                                                                                                                                                                                                                                                                                                                                                                                                                                                      |
|------------------------------------------|----------------------------------------------------------------------------------------------------------------------------------------------------------------------------------------------------------------------------------------------------------------------------------------------------------------------------------------------------------------------|--------------------------------------------------------------------------------------------------------------------------------------------------------------------------------------------------------------------------------------------------------------------------------------------------------------------------------------------------------------------------------------------------------------------------------------------------------------------------------------------------------------------------------------------------------------------------------------------------------------------------------------------------------------------------------------------------------------------------------------------------------------------------------------------------------------------------------------|
| <b>Introduction</b>                      | <p>Introduction (Name, doctoral Student, Interpreter)<br/>         Phoneinterview to quality improvement at NZKJ<br/>         Double check right person?</p> <p>Confidentiality/ Anonymisation<br/>         Informed consent</p>                                                                                                                                     | <p>Hello Ms/Mr XX, my name is YY and Mrs/Mr ZZ will translate.<br/>         Phoneinterview for quality improvement at the NZKJ, duration approx. 10-15 minutes</p> <p>Who was at the emergency department with your child on the XX(date)? If present, can your partner speak better G/E/F?</p> <p>Your information will be treated confidentially and anonymized.<br/>         Do you mind if I ask you a few questions?</p>                                                                                                                                                                                                                                                                                                                                                                                                        |
| <b>Communication without interpreter</b> | <p>Security in D/E/F language? Scale 1-6<br/>         Spoken language at emergency department?<br/>         Difficulties of comprehension?</p> <p>Someone translated?<br/>         Age of non-professional interpreter?<br/>         Wished for interpreter?<br/>         Entitlement to interpreter</p>                                                             | <p>How confident do you feel in G/E/F language on a scale of 1-6? (1 = very uncertain, 6 = very certain)?<br/>         What language did you use talking to the doctor/nurse?<br/>         In your view, were there any linguistic difficulties in comprehension?</p> <p>Did anyone else (child, relative, co-worker,...) translate during your visit?<br/>         How old was he/she who translated?<br/>         Would you have liked an interpreter?<br/>         Do you know that you may always ask for an interpreter in the hospital?</p>                                                                                                                                                                                                                                                                                    |
| <b>Communication with interpreter</b>    | <p>Native language?<br/>         Confident in D/E/F language? Scale 1-6</p> <p>Interpreter:<br/>         Interpreter on site or phone?<br/>         Who whised for an interpreter?<br/>         Entitlement to interpreter<br/>         When was interpreter used?<br/>         Communication before?<br/>         How often?<br/>         Sensible and helpful?</p> | <p>What is your native language?<br/>         How confident do you feel in G/E/F language on a scale of 1-6? (1 = very uncertain, 6 = very certain)?</p> <p>During your visit, an interpreter was translating:<br/>         Was the interpreter on site or was translation done via telephone?<br/>         Did you ask for an interpreter? Or was the interpreter organized by the hospital staff?<br/>         Do you know that you may always ask for an interpreter in the hospital?<br/>         At what point was the interpreter brought in?<br/>         How was communicated before?<br/>         How often was the interpreter needed?<br/>         Did you also request an interpreter at any other time during your consultation?<br/>         Do you think that involving the interpreter was sensible and helpful?</p> |
| <b>Satisfaction</b>                      | <p>Satisfaction from 1-6? Why?</p> <p>Diagnose?<br/>         Informations?<br/>         Therapy? Dosage?</p> <p>What was missing? Improvement proposal?<br/>         Particularly good?<br/>         Come back to NZKJ?</p>                                                                                                                                          | <p>On a scale of 1-6, how satisfied were you with your visit to the emergency department? (1 = very dissatisfied, 6 = very satisfied). Why?</p> <p>What was the diagnosis of your child?<br/>         Was the information provided during your visit clear and understandable? → If no: why not?<br/>         What did your child receive as therapy? What was the dosage?</p> <p>What would you have wished differently? Any suggestions for improvement?<br/>         What did you particularly like?<br/>         If you had another emergency with one of your children, would you feel comfortable coming back to the NZKJ?</p>                                                                                                                                                                                                 |
| <b>Personal facts</b>                    | <p>Arrival in CH?<br/>         Age?<br/>         Education?<br/>         Current profession?<br/>         Asylum status?</p>                                                                                                                                                                                                                                         | <p>How long have you been in Switzerland?<br/>         How old are you?<br/>         What is your highest graduation?<br/>         What is your current profession?<br/>         What is your current residency/ asylum status?</p>                                                                                                                                                                                                                                                                                                                                                                                                                                                                                                                                                                                                  |

|                                                                       |                                                                       |                                                                                                                                                    |
|-----------------------------------------------------------------------|-----------------------------------------------------------------------|----------------------------------------------------------------------------------------------------------------------------------------------------|
| <p>1</p> <p>2</p> <p>3</p> <p>4</p> <p>5</p> <p><b>Wrap up</b></p>    | <p>Answered all the questions</p> <p>Additions?</p> <p>Questions?</p> | <p>From my point of view, you answered all my questions. Thank you for your valuable time and answers. Do you have any additions or questions?</p> |
| <p>6</p> <p>7</p> <p>8</p> <p>9</p> <p><b>Thanks and farewell</b></p> | <p>Thanks</p> <p>Farewell</p>                                         | <p>Thank you very much for answering my questions. I wish you all the best</p>                                                                     |

For peer review only

10  
11  
12  
13  
14  
15  
16  
17  
18  
19  
20  
21  
22  
23  
24  
25  
26  
27  
28  
29  
30  
31  
32  
33  
34  
35  
36  
37  
38  
39  
40  
41  
42  
43  
44  
45  
46

1  
2  
3 **Supplemental figure 1:** concurrent mixed-method approach (modified from Banyard & Williams,  
4  
5  
6  
7  
8  
9  
10  
11  
12 2007)(75).  
13  
14  
15  
16  
17  
18  
19  
20  
21  
22  
23  
24  
25  
26  
27  
28  
29  
30  
31  
32  
33  
34  
35  
36  
37  
38  
39  
40  
41  
42  
43  
44  
45  
46  
47  
48  
49  
50  
51  
52  
53  
54  
55  
56  
57  
58  
59  
60

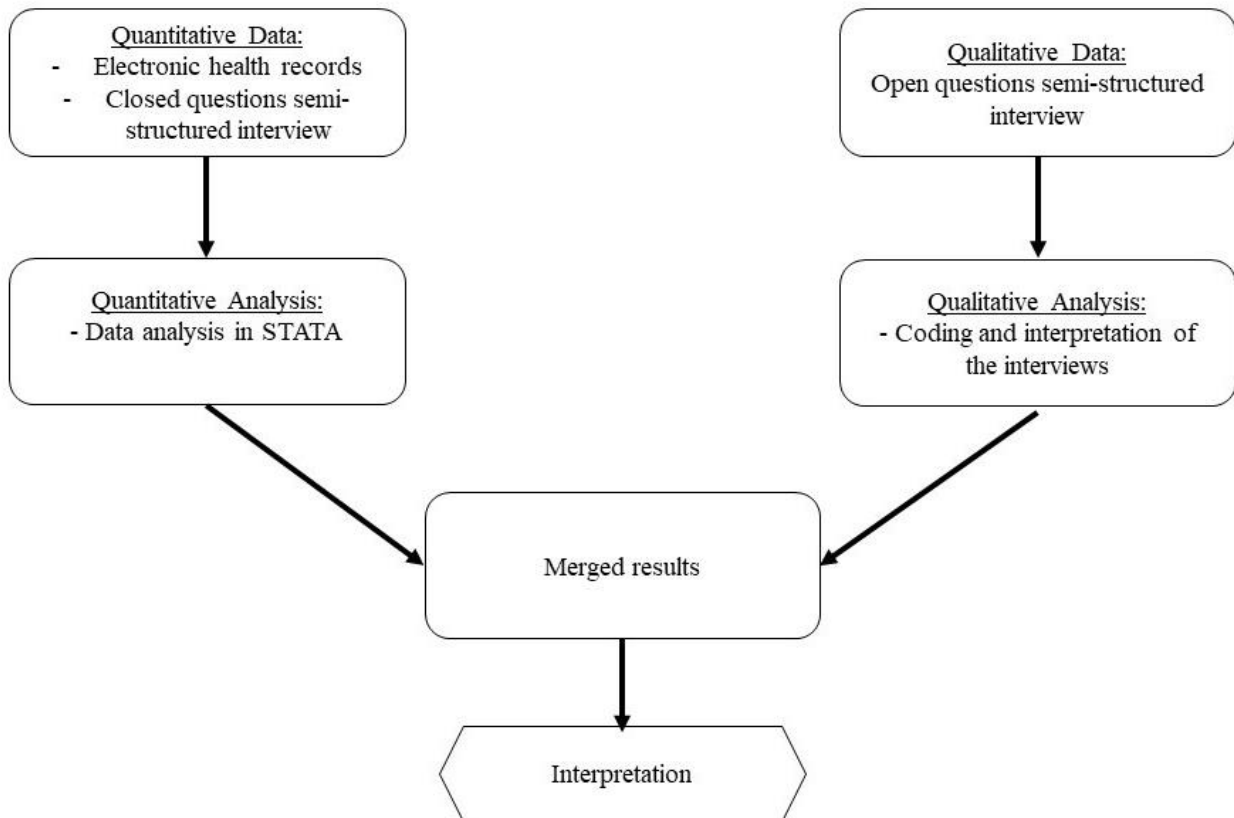

## Supplemental figure 2: Flow chart - Study population

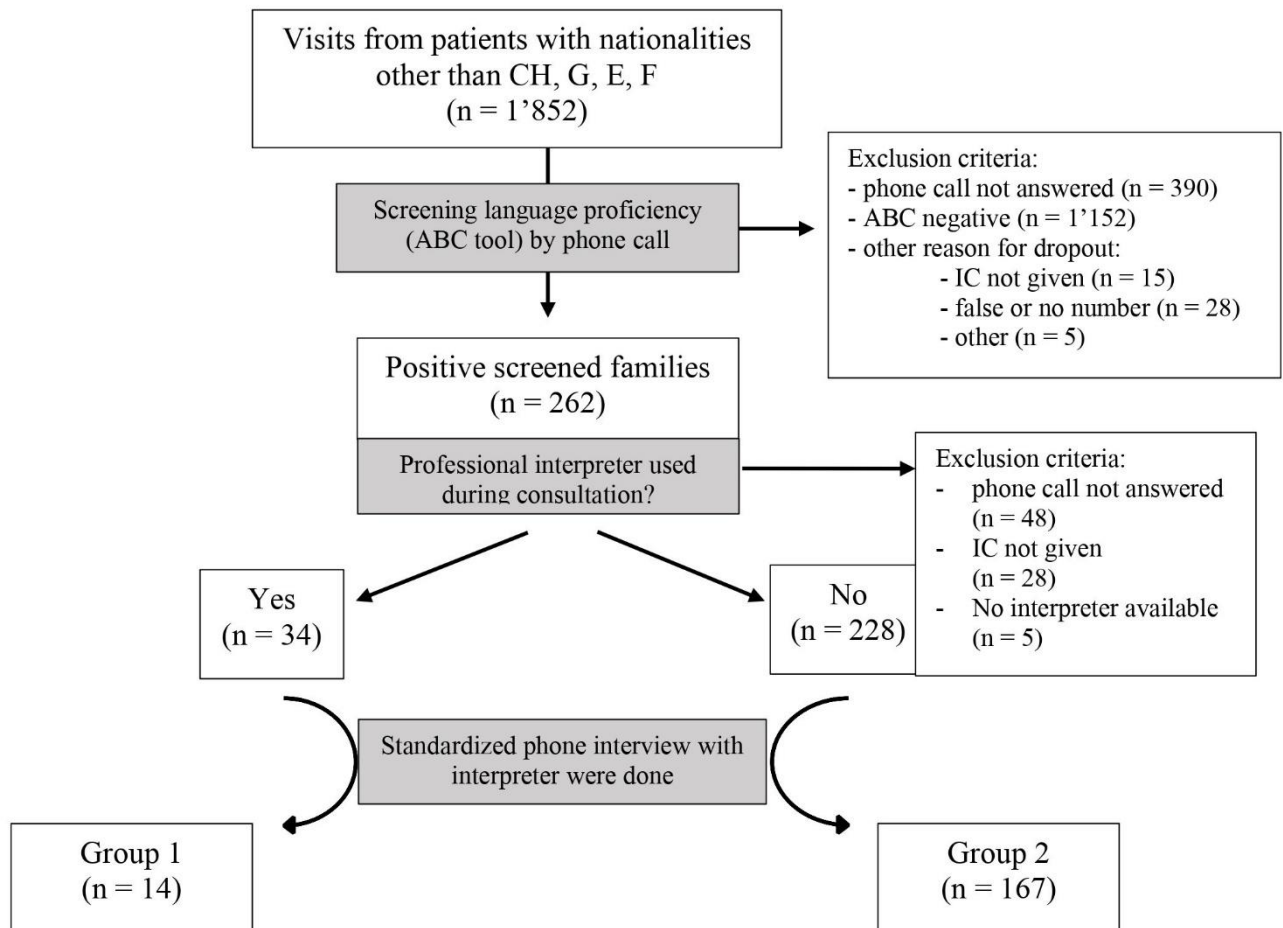

Supplement: bmjopen-2023-077716.draft_revisions.pdf [file bmjopen-2023-077716.draft_revisions.pdf]
