# Supplementary material for: Caregivers with limited language proficiency and their satisfaction with paediatric emergency care related to the use of professional interpreters: a mixed methods study
Source: PubMed Central journal article supplement — BMJ Open. 2024 Jan 12;14(1):e077716. doi: 10.1136/bmjopen-2023-077716 (PMC10806666; doi:10.1136/bmjopen-2023-077716), 2024-01-12

**Supplemental table 1: Checklist for MMR Manuscript preparation and review**

|                                                                 |                                                                                                                                                                                                                                             |
|-----------------------------------------------------------------|---------------------------------------------------------------------------------------------------------------------------------------------------------------------------------------------------------------------------------------------|
| Rational and description of MMR design                          | <input type="checkbox"/> Provide a clear statement of the study purpose                                                                                                                                                                     |
|                                                                 | <input type="checkbox"/> Explicitly describe the MMR design in accordance with <a href="#">Creswell's (2015)</a> typology and use a diagram to illustrate the relationship and sequence of qualitative and quantitative research components |
|                                                                 | <input type="checkbox"/> Justify why the MMR design is appropriate for meeting the study purpose                                                                                                                                            |
| Transparency in describing method details                       | <input type="checkbox"/> Describe the study population(s) and sample(s; e.g., who, what, how many)                                                                                                                                          |
|                                                                 | <input type="checkbox"/> Describe the sampling procedures (including inclusion and exclusion criteria, recruitment)                                                                                                                         |
|                                                                 | <input type="checkbox"/> Describe qualitative data collection processes (how often data were collected, who collected the data, what kind of data collection instruments were used, how data were recorded—e.g., notes, transcripts)        |
|                                                                 | <input type="checkbox"/> Describe quantitative data collection processes (how often data were collected, who collected the data, what kind of data collection instruments were used measurements, validity/reliability)                     |
|                                                                 | <input type="checkbox"/> Describe qualitative data analysis processes (coding, single or multiple coders, replication logic, credibility)                                                                                                   |
|                                                                 | <input type="checkbox"/> Describe quantitative data analysis procedures (missing data and how they are handled, statistical tests used)                                                                                                     |
| Integration of qualitative and quantitative research components | <input type="checkbox"/> Interpret qualitative analysis results with appropriate quotes if necessary                                                                                                                                        |
|                                                                 | <input type="checkbox"/> Interpret quantitative analysis results in consideration of statistical significance, selection bias, and threats to validity                                                                                      |
|                                                                 | <input type="checkbox"/> Compare qualitative and quantitative results                                                                                                                                                                       |
|                                                                 | <input type="checkbox"/> Address divergencies and inconsistencies between qualitative and quantitative results                                                                                                                              |

Supplemental table 2: Interview guide

|                                          |                                                                                                                                                                                                                                                                                              |                                                                                                                                                                                                                                                                                                                                                                                                                                                                                                                                                                                                                                                                                                                                                     |
|------------------------------------------|----------------------------------------------------------------------------------------------------------------------------------------------------------------------------------------------------------------------------------------------------------------------------------------------|-----------------------------------------------------------------------------------------------------------------------------------------------------------------------------------------------------------------------------------------------------------------------------------------------------------------------------------------------------------------------------------------------------------------------------------------------------------------------------------------------------------------------------------------------------------------------------------------------------------------------------------------------------------------------------------------------------------------------------------------------------|
| <b>Introduction</b>                      | <p>Introduction (Name, doctoral Student, Interpreter)<br/>Phoneinterview to quality improvement at NZKJ<br/>Double check right person?</p> <p>Confidentiality/ Anonymisation<br/>Informed consent</p>                                                                                        | <p>Hello Ms/Mr XX, my name is YY and Mrs/Mr ZZ will translate.<br/>Phoneinterview for quality improvement at the NZKJ, duration approx. 10-15 minutes</p> <p>Who was at the emergency department with your child on the XX(date)? If present, can your partner speak better G/E/F?</p> <p>Your information will be treated confidentially and anonymized.<br/>Do you mind if I ask you a few questions?</p>                                                                                                                                                                                                                                                                                                                                         |
| <b>Communication without interpreter</b> | <p>Security in D/E/F language? Scale 1-6<br/>Spoken language at emergency department?<br/>Difficulties of comprehension?</p> <p>Someone translated?<br/>Age of non-professional interpreter?<br/>Wished for interpreter?<br/>Entitlement to interpreter</p>                                  | <p>How confident do you feel in G/E/F language on a scale of 1-6? (1 = very uncertain, 6 = very certain)?<br/>What language did you use talking to the doctor/nurse?<br/>In your view, were there any linguistic difficulties in comprehension?</p> <p>Did anyone else (child, relative, co-worker,...) translate during your visit?<br/>How old was he/she who translated?<br/>Would you have liked an interpreter?<br/>Do you know that you may always ask for an interpreter in the hospital?</p>                                                                                                                                                                                                                                                |
| <b>Communication with interpreter</b>    | <p>Native language?<br/>Confident in D/E/F language? Scale 1-6</p> <p>Interpreter:<br/>Interpreter on site or phone?<br/>Who wished for an interpreter?<br/>Entitlement to interpreter<br/>When was interpreter used?<br/>Communication before?<br/>How often?<br/>Sensible and helpful?</p> | <p>What is your native language?<br/>How confident do you feel in G/E/F language on a scale of 1-6? (1 = very uncertain, 6 = very certain)?</p> <p>During your visit, an interpreter was translating:<br/>Was the interpreter on site or was translation done via telephone?<br/>Did you ask for an interpreter? Or was the interpreter organized by the hospital staff?<br/>Do you know that you may always ask for an interpreter in the hospital?<br/>At what point was the interpreter brought in?<br/>How was communicated before?<br/>How often was the interpreter needed?<br/>Did you also request an interpreter at any other time during your consultation?<br/>Do you think that involving the interpreter was sensible and helpful?</p> |
| <b>Satisfaction</b>                      | <p>Satisfaction from 1-6? Why?</p> <p>Diagnose?<br/>Informations?<br/>Therapy? Dosage?</p> <p>What was missing? Improvement proposal?<br/>Particularly good?<br/>Come back to NZKJ?</p>                                                                                                      | <p>On a scale of 1-6, how satisfied were you with your visit to the emergency department? (1 = very dissatisfied, 6 = very satisfied). Why?</p> <p>What was the diagnosis of your child?<br/>Was the information provided during your visit clear and understandable? → If no: why not?<br/>What did your child receive as therapy? What was the dosage?</p> <p>What would you have wished differently? Any suggestions for improvement?<br/>What did you particularly like?<br/>If you had another emergency with one of your children, would you feel comfortable coming back to the NZKJ?</p>                                                                                                                                                    |
| <b>Personal facts</b>                    | <p>Arrival in CH?<br/>Age?<br/>Education?<br/>Current profession?<br/>Asylum status?</p>                                                                                                                                                                                                     | <p>How long have you been in Switzerland?<br/>How old are you?<br/>What is your highest graduation?<br/>What is your current profession?<br/>What is your current residency/ asylum status?</p>                                                                                                                                                                                                                                                                                                                                                                                                                                                                                                                                                     |

|                                   |                                                                 |                                                                                                                                                        |
|-----------------------------------|-----------------------------------------------------------------|--------------------------------------------------------------------------------------------------------------------------------------------------------|
| <p><b>Wrap up</b></p>             | <p>Answered all the questions<br/>Additions?<br/>Questions?</p> | <p>From my point of view, you answered all my questions. Thank you for your valuable time and answers.<br/>Do you have any additions or questions?</p> |
| <p><b>Thanks and farewell</b></p> | <p>Thanks<br/>Farewell</p>                                      | <p>Thank you very much for answering my questions.<br/>I wish you all the best</p>                                                                     |

**Supplemental figure 1:** concurrent mixed-method approach (modified from Banyard & Williams, 2007)(75).

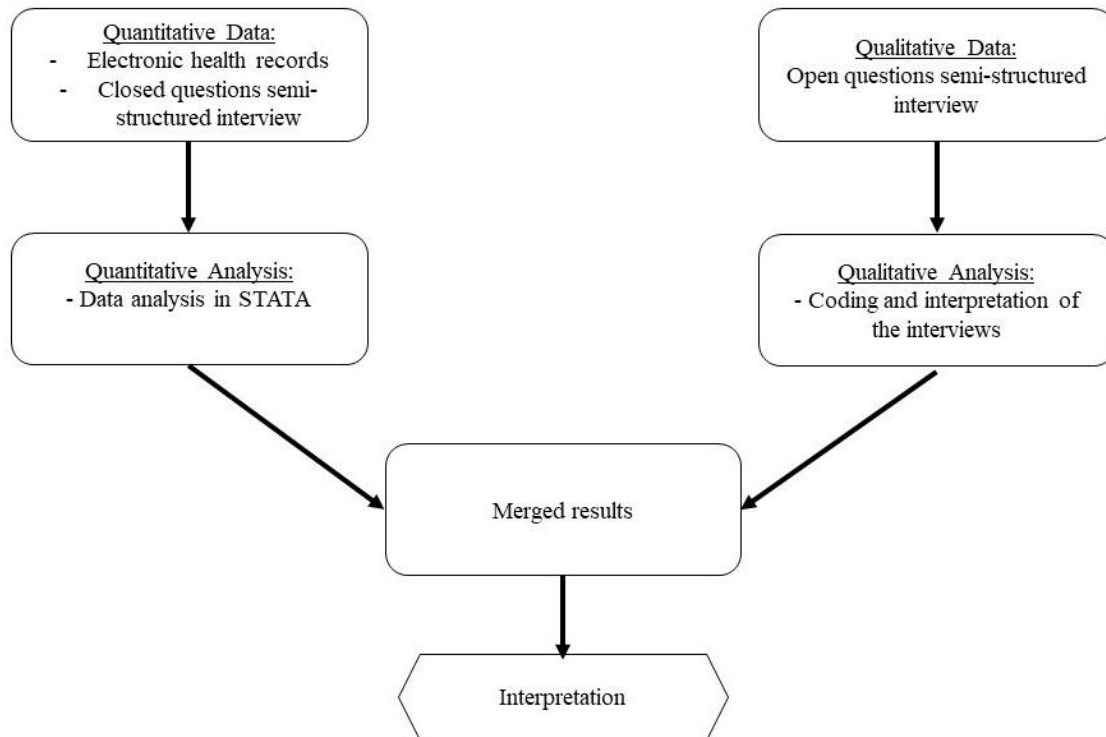

**Supplemental figure 2:** Flow chart - Study population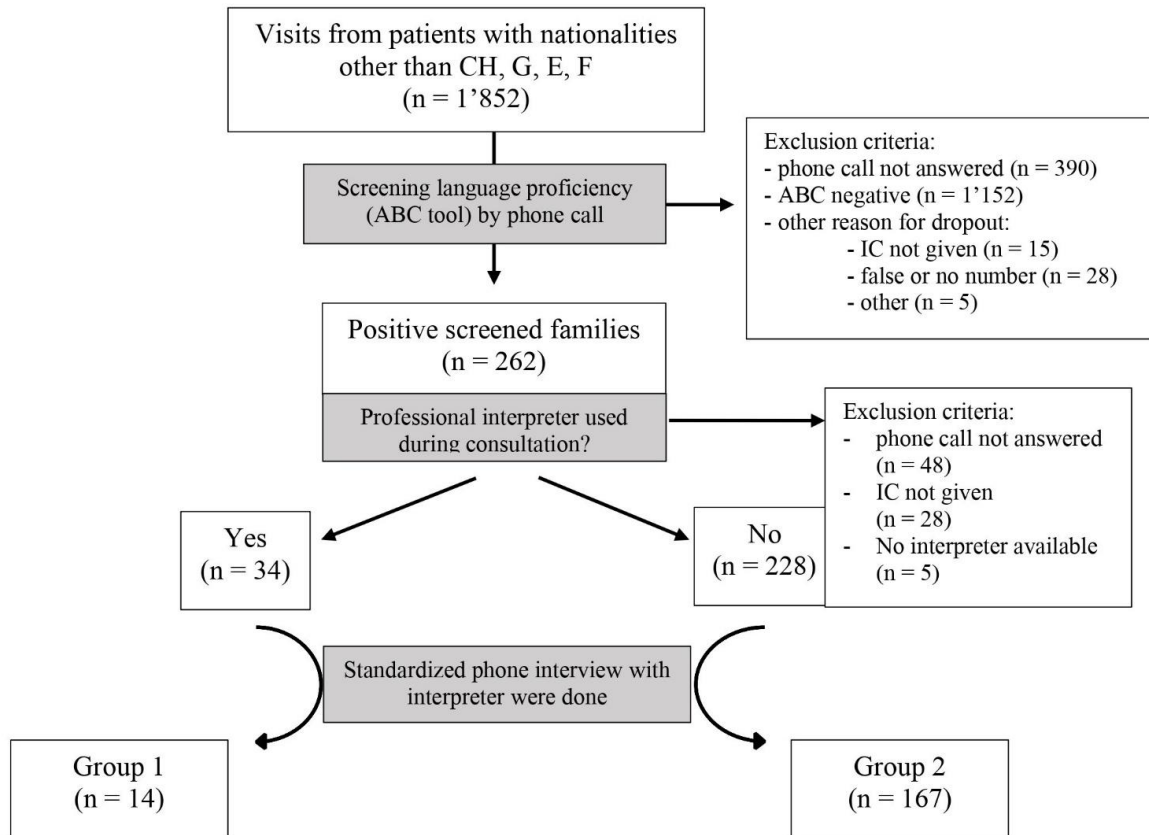

Supplement: bmjopen-2023-077716supp001.pdf [file bmjopen-2023-077716supp001.pdf]
